1 **Title: The zebrafish orthologue of familial Alzheimer's disease gene**  
2 ***PRESENILIN 2* is required for normal adult melanotic skin**  
3 **pigmentation.**

4  
5 **Authors:** Haowei Jiang<sup>1,\*</sup>, Morgan Newman<sup>1</sup>, Michael Lardelli<sup>1</sup>

6  
7 **Affiliations:** <sup>1</sup>University of Adelaide, School of Biological Sciences, Alzheimer's  
8 Disease Genetics Laboratory, North Terrace, Adelaide, SA 5005, AUSTRALIA

9  
10 **\*Corresponding Author:** Haowei Jiang, University of Adelaide, School of  
11 Biological Sciences, Alzheimer's Disease Genetics Laboratory, North Terrace,  
12 Adelaide, SA 5005, AUSTRALIA. Email: [haowei.jiang@adelaide.edu.au](mailto:haowei.jiang@adelaide.edu.au)

13  
14 **Key words:** CRISPR/Cas9, familial Alzheimer's disease, *PRESENILIN 2*,  
15 pigmentation, zebrafish

16  
17 **Abbreviations:** AD, Alzheimer's Disease; CRISPR, clustered regularly interspaced  
18 short palindromic repeats; DSB, double-strand break; HDR, homology-directed  
19 repair ; NHEJ, nonhomologous end joining; NMD, nonsense-mediated decay; PSEN,  
20 *PRESENILIN*; PTC, premature translation-termination codon; TMD, transmembrane  
21 domain;

22

23 **Financial Disclosure Statement:** This research was supported by grants from the  
24 National Health and Medical Research Council of Australia, GNT1061006 and  
25 GNT1126422, and by funds from the School of Biological Sciences of the University  
26 of Adelaide. HJ is supported by an Adelaide Scholarship International from the  
27 University of Adelaide.

28

29 **Conflict of Interest Statement:** The authors declare no conflict of interest.

30

31 **Abstract**

32

33 Alzheimer's disease is the most common form of age-related dementia. At least 15  
34 mutations in the human gene *PRESENILIN 2* (*PSEN2*) have been found to cause  
35 familial Alzheimer's disease (fAD). Zebrafish possess an orthologous gene, *psen2*,  
36 and present opportunities for investigation of *PRESENILIN* function related to  
37 Alzheimer's disease. The most prevalent and best characterized fAD mutation in  
38 *PSEN2* is *N141I*. The equivalent codon in zebrafish *psen2* is N140. We used genome  
39 editing technology in zebrafish to target generation of mutations to the N140 codon.  
40 We isolated two mutations: *psen2*<sup>N140fs</sup>, (hereafter "*N140fs*"), causing truncation of the  
41 coding sequence, and *psen2*<sup>T141\_L142delinsMISLISV</sup>, (hereafter  
42 "*T141\_L142delinsMISLISV*"), that deletes the two codons immediately downstream  
43 of N140 and replaces them with seven codons coding for amino acid residues  
44 MISLISV. Thus, like almost every fAD mutation in the *PRESENILIN* genes, this latter  
45 mutation does not truncate the gene's open reading frame. Both mutations are  
46 homozygous viable although *N140fs* transcripts are subject to nonsense-mediated  
47 decay and lack any possibility of coding for an active  $\gamma$ -secretase enzyme. *N140fs*  
48 homozygous larvae initially show grossly normal melanotic skin pigmentation but  
49 subsequently lose this as they grow while retaining pigmentation in the retinal  
50 pigmented epithelium. *T141\_L142delinsMISLISV* homozygotes retain faint skin  
51 melanotic pigmentation as adults, most likely indicating that the protein encoded by  
52 this allele retains weak  $\gamma$ -secretase activity. Null mutations in the human

53 *PRESENILIN* genes do not cause Alzheimer's disease so these two mutations may be  
54 useful for future investigation of the differential effects of null and fAD-like  
55 *PRESENILIN* mutations on brain aging.

56

## 57 **Introduction**

58

59 Alzheimer's disease (AD) is a progressive neurodegenerative disorder, and is the most  
60 common form of age-related dementia, accounting for 50-75% of dementia cases  
61 worldwide (1). Most AD occurs after the age of 65 years (late onset) and is sporadic.  
62 Early onset AD is far less common and approximately 13% of early onset cases are  
63 familial AD (fAD) (2). Autosomal dominant inheritance of mutations in the  
64 *AMYLOID BETA A4 PRECURSOR PROTEIN* gene (*APP*) (3), *PRESENILIN 1* and 2  
65 genes (*PSENI*, *PSEN2*) (4), and *SORTILIN-RELATED RECEPTOR* gene (*SORL1*) (5,  
66 6) are considered to be the major cause of fAD. Of the two *PRESENILIN* genes,  
67 *PSEN2* is a less common locus for fAD mutations than *PSENI*. Only around 15 fAD  
68 mutations have been reported in *PSEN2* to date, compared to over two hundred  
69 mutations reported in *PSENI* (4). All but one of the many different fAD mutations in  
70 the *PSEN* genes do not cause truncation of coding sequences, a phenomenon we have  
71 previously described as the "fAD mutation reading frame preservation rule" (7).

72

73 *PSEN* proteins become endoproteolytically cleaved during activation of  $\gamma$ -secretase  
74 activity to form N- and C-terminal fragments (NTF and CTF respectively) (8). The

75 NTFs and CTFs of PSEN2 predominantly localise to the endoplasmic reticulum (ER)  
76 (9) and to late endosomes / lysosomes (10). The first two transmembrane domains  
77 (TMDs) of PSEN2 are thought to be necessary for ER localisation (11) while a  
78 conserved sequence near the N-terminal is bound by Adaptor Complex AP-1 to direct  
79 PSEN2 protein to late endosomes / lysosomes (10). The localisation of PSEN2, rather  
80 than PSEN1, to late endosomes / lysosomes implies a particular importance for  
81 PSEN2 in the biogenesis of melanosomes (10, 12), an organelle type related to  
82 lysosomes (13) that is specialised for formation of the dark pigment melanin (14).

83

84 The first fAD mutation reported in *PSEN2* was *N141I*, caused by an A-to-T transition  
85 at the second position of codon 141 (15). The *N141I* mutation alters the N-terminal  
86 flank of the second TMD (TMD2) of PSEN2 by substituting a hydrophobic isoleucine  
87 residue for the hydrophilic asparagine residue immediately downstream of the first  
88 residue of TMD2. This position is thought to be important for accurate positioning of  
89 the transmembrane  $\alpha$ -helix structure (16). A PolyPhen-2 (17) analysis of the *N141I*  
90 mutation indicates probable damage to protein structure with a score of 0.934  
91 (sensitivity: 0.80; specificity: 0.94). The mean age of Alzheimer's disease onset for  
92 carriers of *N141I* is 53.7 years old, but with a very wide range of 39 to 75 years (4).  
93 Thus, *N141I* has an age of onset overlapping those of *PSEN1* fAD families (mean age  
94 of onset of 45.5 years) and sporadic AD (mean age of onset of 71.5) (4). The *N141I*  
95 mutation is thought to increase the ratio of A $\beta$ 42 to A $\beta$ 40 via abnormal  $\gamma$ -secretase  
96 activity (18). A more recent transgenic mouse model of AD suggested that both A $\beta$ 42

97 and A $\beta$ 40 production are enhanced by *NI4II*, and this can significantly accelerate  
98 A $\beta$ -dependent dysfunction in spatial learning and memory (19).

99

100 Mammalian PRESENILINs have also been found necessary for tyrosinase trafficking  
101 and melanin formation by a  $\gamma$ -secretase-dependent mechanism (20). TYROSINASE is  
102 a key enzyme in melanin synthesis (21). The two TYROSINASE-related proteins,  
103 TYROSINASE-related protein 1 (Tyrp1) and DOPACHROME TAUTOMERASE  
104 (DCT) (also known as TYROSINASE-related protein 2 (Tyrp2)) (22), are implicated  
105 in the activity of the intramembrane protease,  $\gamma$ -secretase (20, 23). A partial  
106 loss-of-function in melanotic pigment formation has been observed in a mouse model  
107 of the *PSEN1* fAD mutation *M146V* (20).

108

109 In mammals, the protein SILVER, MOUSE, HOMOLOG OF (SILV, also known as  
110 PREMELANOSOMAL PROTEIN, PMEL) (24) is another type 1 membrane protein  
111 that can be cleaved by proteases including  $\gamma$ -secretase (25) to form a natural  
112 functional amyloid that facilitates melanin formation (12). SILV is expressed in  
113 pigment cells of the eye and skin, which synthesise melanin pigments within  
114 melanosomes (26). After a juxtamembrane cleavage, the C-terminal fragment of SILV  
115 is then processed by the  $\gamma$ -secretase complex to release an intracellular domain  
116 fragment (25) into endosomal precursors to form amyloid fibrils. These ultimately  
117 become melanosomes (27, 28).

118

119 Zebrafish are a versatile system in which to investigate, at the molecular level, the  
120 effects on the brain and other tissues of fAD mutations (29). The ability to generate  
121 large families of siblings and then raise these in a near identical environment (the  
122 same tank or the same recirculated-water system) can reduce genetic and  
123 environmental variability to allow more sensitive detection of mutation-dependent  
124 changes. The organisation of the genome and the genetic pathways controlling signal  
125 transduction and development of zebrafish and humans are highly conserved (30).  
126 Despite ~420 million years of divergent evolution of the human and zebrafish  
127 lineages (31), most human genes have clearly identifiable orthologues in zebrafish.  
128 Thus, the zebrafish genes *psen1* (32) and *psen2* (33) are orthologues of human *PSEN1*  
129 and *PSEN2*, respectively. The Presenilin protein sequences of zebrafish show  
130 considerable identity with those of humans. The zebrafish Psen1 protein shows 73.9%  
131 amino acid residue (aa) identity with human PSEN1 (32), while zebrafish Psen2  
132 shows 74% identity with human PSEN2 (33).

133

134 In this paper, we describe an attempt to generate a zebrafish model of the *N141I* fAD  
135 mutation of human *PSEN2* by introducing an equivalent mutation into the zebrafish  
136 *psen2* gene. While homology-directed repair (HDR) after CRISPR Cas9 cleavage at  
137 the relevant site in zebrafish *psen2* was not successful, we did find products of  
138 non-homologous end joining (NHEJ) that will prove useful in future analyses. We  
139 identified both a frameshift mutation and a reading frame-preserving indel mutation  
140 close to the N141-equivalent codon of zebrafish *psen2* (N140). Surprisingly, we

141 discovered that the  $\gamma$ -secretase activity of Psen2 (unlike that of Psen1) appears  
142 essential for melanotic pigment formation in the skin of zebrafish adults but not in  
143 their retinal pigmented epithelium.

144

## 145 **Materials and Methods**

146

### 147 **Animal ethics**

148

149 All experiments using zebrafish were conducted under the auspices of the Animal  
150 Ethics Committee of the University of Adelaide. Permits S-2014-108 and S-2017-073.

151

### 152 **CRISPR guide RNA (sgRNA) design and synthesis**

153

154 The target sequence of the sgRNA used to generate double-stranded breaks near the  
155 N140 codon in zebrafish *psen2* is 5'-GAATTCGGTGCTCAACTC *TGG*-3'. The  
156 template for sgRNA transcription was synthesised by PCR (34). The forward primer  
157 for this template synthesis PCR contains a T7 polymerase binding site (the underlined  
158 region), the target sequence (bold) and a region complementary to a common reverse  
159 primer (italicised):

160 5'-GAAATTAATACGACTCACTATAGG**GAATTCGGTGCTCAACTCGTTTT**

161 *AGAGCTAGAAATAGC*-3'. The sequence of the reverse primer is 5'-

162 AAAAGCACCGACTCGGTGCCACTTTTTCAAGTTGATAACGGACTAGCCTTA



163 TTTTAACTTGCTATTTCTAGCTCTAAAAC-3'. This synthesis PCR used Phusion®  
164 High-Fidelity DNA Polymerase (NEB, Ipswich, Massachusetts, USA, M0530S) and  
165 cycle conditions of 98°C for 30 s and then 35 cycles of [98°C, 10 s; 60°C, 30 s; 72°C,  
166 15 s] then 72°C, 10 min. The template was then gel-purified using the Wizard® SV  
167 Gel and PCR Clean-Up System (Promega, Madison, Wisconsin, USA, A9281). The  
168 target sgRNA was synthesized from this template using the HiScribe™ T7 Quick  
169 High Yield RNA Synthesis Kit (NEB, Ipswich, Massachusetts, USA, E2050S).

170

171 **Design of single-stranded oligonucleotide templates for homology-directed repair**  
172 **(HDR)**

173

174 To attempt to introduce the *N140I* mutation into zebrafish *psen2* (equivalent to human  
175 *PSEN2 N141I*), a single stranded oligonucleotide template (“N140I oligo”) containing  
176 the N>I mutation (A>T, bold italics and underlined) followed by two silent  
177 (synonymous codon) mutations (T>C and G>C, italicised and underlined) was  
178 designed:

179 5'-ACTCAGTGGGCCAGCGTCTGCTGAATTCGGTGCTC**ATCACCCTCG**TCATG  
180 ATCAGTGTGATTGTCTTCATGACC-3'.

181

182 We also attempted (unsuccessfully) to introduce the *VI47I* mutation into zebrafish  
183 *psen2*, (equivalent to *VI48I* in human *PSEN2*) using a single-stranded oligonucleotide  
184 template (“V147I oligo”), containing the V>I mutation (G>A and G>C, bold italics

185 and underlined) followed by two silent (synonymous codon) mutations (T>A and C>G,  
186 italicised and underlined): 5'-  
187 CTGAATTCGGTGCTCAACACTCTGGTCATGATCAGTATCATAGTGTTCATGA  
188 CCATCATCCTGGTGCTGCTCTAC-3'. The attempted mutation of the *VI47* site in  
189 *psen2* is only described and discussed in Supplemental Information.

190

191 The single-stranded oligonucleotide templates were co-injected with their  
192 corresponding CRISPR/Cas9 systems, so that any induced double-stranded DNA  
193 breaks (DSBs) might be repaired through the HDR pathway (35) to insert desired  
194 mutations into the zebrafish genome.

195

#### 196 **Injection of zebrafish embryos**

197

198 Tübingen (TU) strain wild type embryos were collected from mass spawning. The  
199 target sgRNA (70 ng/μL final concentration) was mixed with “N140I oligo” (30 ng/μL  
200 for final concentration) and Cas9 nuclease (1μg/μL for final concentration)  
201 (Invitrogen, Carlsbad, California, USA, B25640), and then incubated at 37°C for 15  
202 min to maximize formation of active CRISPR Cas9 complexes. 5-10 nL of the  
203 mixture was then injected into zebrafish embryos at the one-cell stage. The injected  
204 embryos were subsequently raised for mutation screening.

205

#### 206 **Mutation detection in CRISPR Cas9-injected G0 fish**

207

208 From each batch of injected embryos, 10 embryos were selected at random at ~24 hpf  
209 and pooled for genomic DNA extraction. The genomic DNA of these embryos was  
210 extracted using sodium hydroxide (36). The 10 embryos were placed in 100  $\mu$ L of 50  
211 mM NaOH and then heated to 95°C for 15 min. They were then cooled to 4°C  
212 followed by addition of 1/10th volume of 1 M Tris-HCl, pH 8.0 to neutralize the basic  
213 solution (36).

214

215 Mutation-specific primers were designed to detect mutation-carrying fish by PCR. For  
216 the “N140I oligo”-injected embryos, a mutation-specific forward primer was designed:  
217 5'-TCGGTGCTCAATCACCCTC-3'. A wild type-specific forward primer  
218 (5'-TCGGTGCTCAAACTCTG-3') and a common reverse primer  
219 (5'-ACCAAGGACCACTGATTCAGC-3') were also designed. The PCR conditions  
220 for both these reactions are: 95°C, 2 min and then 31 cycles of [95°C, 30 s; 58°C, 30 s;  
221 72°C 30 s], then 72°C, 5 min. The lengths of the expected PCR products of these  
222 reactions are all ~300 nucleotides.

223

224 For the “V147I oligo”-injected embryos, a mutation-specific forward primer was  
225 designed: 5'-TCTGGTCATGATCAGTATCATAGTG-3'. A wild type-specific forward  
226 primer (5'-TCTGGTCATGATCAGTGTGATTGTC-3') and a common reverse primer  
227 (5'-TCACCAAGGACCACTGATTCAGC-3') were also designed. The PCR  
228 conditions for all these three reactions are: 95°C, 2 min, and then 31 cycles of [95°C,

229 30 s; 58°C, 30 s; 72°C, 30 s], then 72°C 5 min. The lengths of the PCR products of  
230 these reactions are ~280 nucleotides.

231

232 The F1 progeny of the mosaic, mutation-carrying G0 fish were also screened with  
233 these mutation-specific PCR reactions.

234

### 235 **Mutation detection in F1 fish using the T7 endonuclease I assay**

236

237 Since the DSBs induced by the CRISPR/Cas9 system may also be repaired through  
238 the NHEJ pathway (35, 37), random mutations may also be generated at the DSB sites.  
239 Thus, the F1 progeny of the mosaic, mutation-carrying G0 fish may be heterozygous  
240 for such random mutations.

241

242 To screen for these mutations, the genomic DNA of tail biopsies from F1 fish was  
243 extracted using sodium hydroxide as above, followed by analysis using the T7  
244 endonuclease I assay (since T7 endonuclease I is able to recognize and cleave at the  
245 sites of mismatches in DNA heteroduplexes (38)).

246

247 A pair of amplification primers binding in the regions flanking the N140 target site  
248 was designed: 5'-AGCATCACCTTGATTCAAGG-3' and  
249 5'-GGTTCCTGATGACACACTGA-3'. The PCR conditions for this amplification  
250 reaction are 95°C, 2 min and then 31 cycles of [95°C, 30 s; 58°C, 30 s; 72°C, 30 s],

251 then 72°C, 5 min and the amplified fragment is predicted to be 473 nucleotides in  
252 length. The PCR products were purified using the Wizard® SV Gel and PCR  
253 Clean-Up System (Promega, Wisconsin, USA, A9281). These purified PCR products  
254 were then denatured at 95°C for 5 min and then annealed by slow cooling of the  
255 samples at -2°C/sec from 95°C to 85°C and then -0.1°C/sec from 85°C to 25°C).  
256 Finally, the annealed PCR products were digested using T7 endonuclease I (NEB,  
257 Ipswich, Massachusetts, USA, M0302S) was added to. If reannealed fragments  
258 contained mismatches due to mutations, they would be cleaved by T7 endonuclease I  
259 into two fragments; ~109 nucleotides (upstream) and ~364 nucleotides (downstream).  
260 Those amplified and reannealed fragments showing positive signals (cleavage) in T7  
261 endonuclease I assays were then sent to the Australian Genome Research Facility  
262 (AGRF, North Melbourne, VIC, Australia) for Sanger sequencing to identify the  
263 mutations.

264

#### 265 **Mutation detection in F2 fish using PCR**

266

267 Mutation-specific PCR primers were designed to detect the two mutations (*NI40fs*  
268 and *T141\_L142delinsMISLISV*) identified in F1 fish. For *NI40fs*, a mutation-specific  
269 forward primer (5'-TGCTGAATTCGGTGCTCTG-3') was designed. For  
270 *T141\_L142delinsMISLISV*, another mutation-specific forward primer (5'-  
271 TGAATTCGGTGCTCAACATG-3') was designed. A wild type-specific forward  
272 primer (5'-TGAATTCGGTGCTCAACACTC-3') was designed as a control. A

273 common reverse primer (5'-TCACCAAGGACCACTGATTCAGC-3') was used with  
274 these three different forward primers. The temperature cycling conditions for these  
275 PCRs are identical for the wild type and *NI40fs* alleles: 95°C, 2 min, and then 31  
276 cycles of [95°C, 30 s; 60°C, 30 s; 72°C, 30 s], then 72°C, 5 min. For detection of the  
277 *T141\_L142delinsMISLISV* allele, the annealing temperature was altered to 61.5°C.  
278 The PCR products of these reactions are all predicted to be ~320 nucleotides in  
279 length.

280

### 281 **Breeding of mutant fish**

282

283 Since the mutation-carrying G0 fish were mosaic for mutations, these were outbred  
284 with wild type TU fish so that their progeny (F1 fish) would be completely  
285 heterozygous for any mutations.

286

287 The F1 fish carrying the *T141\_L142delinsMISLISV* or *NI40fs* alleles were outbred  
288 with wild type TU fish to generate additional individuals heterozygous for the  
289 mutations. (The families of progeny of such matings would consist of 50%  
290 heterozygous mutants and 50% wild type fish). When these F2 progeny were sexually  
291 mature, pairs of heterozygous individuals were in-crossed to generate F3 families  
292 containing homozygous mutant, heterozygous mutant and wild type siblings for  
293 further analysis.

294

295

296 **Imaging of skin pigmentation in zebrafish**

297

298 The pigmentation patterns of mutant zebrafish were imaged using a Leica  
299 Microsystems, Type DFC450 C microscope, and the software Leica Application Suite,  
300 Version 4.9.0 (Leica Microsystems, Wetzlar, Germany).

301

302 **Total RNA extraction from 6-month-old zebrafish brains**

303

304 When F2 fish families from outcrossed heterozygous mutant F1 fish were 6 months of  
305 age, eight female fish of each genotype (i.e. eight wild type and eight heterozygous  
306 mutant individuals) were selected for brain removal (after euthanized by submersion  
307 in ice water) and total RNA extraction. From these fish, four of each genotype were  
308 exposed to hypoxia according to the method we have previously established (39). The  
309 dissolved oxygen content of the hypoxic water was ~1.00 mg/L (treated for ~2.5 h),  
310 while the other four fish of each genotype were exposed to normoxia (i.e. the  
311 dissolved oxygen content of the normoxic water was ~6.60 mg/L). Total RNA was  
312 extracted from these brains using the *mirVana*<sup>TM</sup> miRNA Isolation Kit (Ambion,  
313 Inc, Foster City, California, USA, AM1560). cDNA was synthesised from the RNA  
314 using the SuperScript<sup>TM</sup> III First-Strand Synthesis System (Invitrogen, Carlsbad,  
315 California, USA, 18080051) and Random Primers (Promega, Madison, Wisconsin,  
316 USA, C1181).

317

318 **Allele-specific expression analysis by digital quantitative PCR (dqPCR)**

319

320 PCR primer pairs detecting specific alleles were designed for dqPCR: a specific  
321 forward primer for mutation *T141\_L142delinsMISLISV*  
322 (5'-TGAATTCGGTGCTCAACATG-3'), a specific forward primer for mutation  
323 *N140fs* (5'-TGCTGAATTCGGTGCTCTG-3'), and a specific forward primer for  
324 the wild type allele (5'-TGAATTCGGTGCTCAACACTC-3'). A common reverse  
325 primer (5'-AAGAGCAGCATCAGCGAGG-3') was used with all these three forward  
326 primers. Allele-specific dqPCR was performed using the QuantStudio™ 3D Digital  
327 PCR System (Life Sciences, Waltham, MA, USA) with QuantStudio™ 3D Digital  
328 PCR 20K Chip Kit v2 and Master Mix (Life Sciences, Waltham, MA, USA, A26317)  
329 and SYBR™ Green I Nucleic Acid Gel Stain (Life Sciences, Waltham, MA, USA,  
330 S7563). The dqPCR conditions for allele-specific expression detection are 96°C, 10  
331 min, then 49 cycles of [62°C, 2 min; 98°C, 30 s], then 62°C 2 min. The expected  
332 length of the PCR products is ~130 bp. 25ng of cDNA (based on quantification of  
333 RNA concentration and the assumption of complete reverse transcription into cDNA)  
334 of each sample was loaded into each chip. The chips were analysed using  
335 QuantStudio™ 3D AnalysisSuite Cloud Software (Life Sciences, Waltham, MA,  
336 USA).

337

338 **Results**



339

340 **fAD-like and coding sequence-truncating mutations in *psen2***

341

342 Our initial aim was to create mutations in zebrafish *psen2* equivalent to the fAD  
343 mutations of human *PSEN2*, *N141I* and *V148I* (*N140I* and *V147I* in zebrafish  
344 respectively). However, while CRISPR Cas9-targeting of these sites appeared  
345 feasible, no incorporation of desired mutations via homology-directed repair was  
346 found. Nevertheless, two mutations at the N140 site were ultimately identified. One of  
347 these is an indel mutation removing two codons (T141 and L142) and replacing these  
348 with seven novel codons (MISLISV). Consequently, this allele is designated  
349 *T141\_L142delinsMISLISV* and may be considered EOfAD-like in that it does not  
350 truncate the coding sequence (CDS) (Fig 1). The second mutation is a deletion of 7  
351 nucleotides causing a frameshift that does truncate the coding sequence, *N140fs*, due  
352 to a premature termination codon (PTC) at the 142<sup>nd</sup> codon position.

353

354 **Fig 1. Predicted protein primary and secondary structures.**

355 (A) The protein coding sequence of zebrafish *Psen2* is altered by the mutations.

356 (B) The predicted protein structures of zebrafish *Psen2* are also changed by the two  
357 identified mutations (and are shown relative to the wild type structure and a structure  
358 incorporating a hypothetical *N140I* mutation. Purple bar: helix; yellow arrow: strand;  
359 black line: coil; Conf: confidence of prediction; Pred: predicted secondary structure;  
360 AA: target sequence.

361

362 Inbreeding of *T141\_L142MISLISV* and *N140fs* mutant fish showed both mutations to  
363 be homozygous viable although both showed severe defects in skin pigmentation in  
364 post-larval stages (described later).

365

### 366 **Changes of protein structure caused by the mutations**

367

368 PRESENILINs have a complex structure with multiple TMDs. Therefore, mutations  
369 have the potential to greatly disturb protein structure by interfering with normal  
370 membrane insertion. To understand the possible consequences of, in particular, the  
371 *T141\_L142delinsMISLISV* mutation, we compared theoretical hydropathicity plots  
372 (40) for our isolated mutations with those for wild type *psen2* and a mutation  
373 equivalent to human *N141I* (Fig 2). The *T141\_L142delinsMISLISV* mutation  
374 contributes only non-polar (M, I, L, V) or, at least, uncharged, polar (S) amino acid  
375 residues (aa) to the protein structure, presumably expanding the hydrophobic stretch  
376 of aas that form TMD2. Presumably, this mutation allows overall correct membrane  
377 insertion but disrupts the conformation of the protein sufficiently to almost entirely,  
378 but not completely, destroy its  $\gamma$ -secretase activity (see later).

379

### 380 **Fig 2. Predicted protein hydropathicity plots.**

381 The blue line refers to wild type *Psen2*. The red lines refer to the mutants.

382

383 The *NI40fs* mutation cannot possibly express a catalytically active  $\gamma$ -secretase  
384 enzyme since it truncates the CDS at the start of TMD2. Thus, it lacks both the  
385 aspartate residues required for the  $\gamma$ -secretase catalytic domain (41, 42).

386

387 ***NI40fs* transcripts are subject to nonsense-mediated decay**

388

389 Mutations creating premature termination codons (PTCs) in coding sequences  
390 upstream of exon-exon junctions in spliced transcripts can result in destabilisation of  
391 the transcripts through nonsense-mediated decay (NMD, reviewed by (43)). Therefore,  
392 we expected that transcripts from the *T141\_L142delinsMISLISV* allele might be  
393 similarly stable to wild type transcripts while *NI40fs* allele transcripts would show  
394 decreased stability and abundance. To test this we performed dqPCR that allows direct  
395 comparison of transcript abundances. We extracted total RNA from the brains of  
396 6-month-old adult zebrafish, reverse transcribed this to cDNA, and then performed  
397 dqPCR with primers specifically detecting the wild type or mutant alleles. The results  
398 confirmed similar levels of *T141\_L142delinsMISLISV* and wild type transcripts in  
399 heterozygous mutant brains but levels of *NI40fs* transcripts are only approximately 25%  
400 of those for wild type transcripts in heterozygous mutant brains (Fig 4). The first  
401 round of translation of a transcript is critical for NMD and so inhibition of translation  
402 (e.g. with cycloheximide) can increase the stability of transcripts with PTCs (44, 45).  
403 Cycloheximide treatment of a group of embryos heterozygous for *NI40fs* caused an  
404 approximately 5-fold increase in *NI40fs* allele-derived transcripts but only an

405 approximately 2-fold increase in wild type transcripts (S4 File) supporting that NMD  
406 destabilises *NI40fs* transcripts.

407

### 408 **Stability of mutant allele transcripts under normoxia compared to hypoxia**

409

410 Numerous lines of evidence support that hypoxia is an important factor in the  
411 development of AD (reviewed in (46)). This includes that expression of the fAD  
412 genes, *PSEN1*, *PSEN2* and *APP* are upregulated under hypoxia (47-50), phenomena  
413 that are conserved in zebrafish (51) despite ~420 million years of divergent evolution  
414 from mammals (52). Also, hypoxia has previously been observed to inhibit NMD (53).  
415 Therefore, to observe how hypoxia might affect the levels of transcripts from our  
416 mutant alleles we performed dqPCR using total RNA extracted from the brains of  
417 6-month-old zebrafish exposed to normoxia or hypoxia (Figs 3 and 4). This revealed  
418 little effect of hypoxia on the levels of transcripts from wild type or  
419 *T141\_L142delinsMISLISV* alleles (Fig 3) in heterozygous fish brains (that is most  
420 likely due to the young age of the fish, see Discussion) and a small, but apparently  
421 statistically significant increase in the levels of *NI40fs* allele transcripts (Fig 4).  
422 However, we cannot distinguish whether this increase is due to induction of  
423 transcription, or inhibition of NMD, or both (or other factors that could increase  
424 transcript levels).

425

426 **Fig 3. *psen2* wild type and *T141\_L142delinsMISLISV* allele-specific expression**

427 **(as copies per the 25 ng of total brain cDNA in each dqPCR).**

428 The expression levels of wild type *psen2* alleles in *T141\_L142delinsMISLISV/+* fish  
429 (~460 copies) were significantly ( $p=0.0024$ ) lower than in their wild type siblings  
430 (~950 copies) under normoxia. Under hypoxia, the expression levels of wild type  
431 *psen2* alleles in both *T141\_L142delinsMISLISV/+* fish (~1,000 copies) and their wild  
432 type siblings (~510 copies) were up-regulated, but neither of the genotypes showed  
433 statistically significant differences compared to their normoxic controls. The  
434 expression levels of the *T141\_L142delinsMISLISV* alleles in  
435 *T141\_L142delinsMISLISV/+* fish (~520 copies under normoxia) were increased by  
436 acute hypoxia (~580 copies), but without statistical significance. Means with SDs are  
437 indicated.

438

439 **Fig 4. *psen2* wild type allele and *NI40fs* allele-specific expression (as copies per**  
440 **the 25 ng of total brain cDNA in each dqPCR).**

441 The expression levels of wild type *psen2* alleles in *NI40fs/+* fish (~860 copies) were  
442 significantly ( $p=0.0024$ ) lower than in their wild type siblings (~1,600 copies) under  
443 normoxia. Under hypoxia, the expression levels of wild type *psen2* alleles in both  
444 *NI40fs/+* fish (~860 copies) and their wild type siblings (~1,700 copies) were slightly  
445 up-regulated, but not with statistical significance compared to these genotypes under  
446 normoxia. The expression levels of *NI40fs* alleles in *NI40fs/+* fish (~150 copies  
447 under normoxia) were increased ( $p=0.0513$ ) by acute hypoxia (~160 copies). Means  
448 with SDs are indicated.

449

450 **Pigment phenotypes of mutation-carrying fish**

451

452 During the process of isolating mutations in *psen2*, we observed that some of the G0  
453 CRISPR Cas9-injected, mosaic, mutation-carrying fish showed unique patches of  
454 pigmentation loss in their skin (Fig 5A). (Four of 12 G0 fish injected with the  
455 CRISPR Cas9 complex targeting the N140 codon showed this phenotype). None of  
456 the F1 progeny of these fish (heterozygous for either of the mutations in *psen2*)  
457 showed obvious pigmentation loss. However, when inbreeding F2 heterozygous  
458 mutant fish we found that some of the F3 progeny for either the  
459 *T141\_L142delinsMISLISV* mutation or the *N140fs* mutation showed reduction in  
460 surface melanotic pigmentation obvious to the unaided eye by one month of age.  
461 Genotyping of these fish using allele-specific PCR on tail biopsies showed them to be  
462 homozygous mutants, supporting that the reduced pigmentation phenotypes of the  
463 mutations are recessive (see Fig 5B,C). Subsequently, we observed the development  
464 of surface pigmentation with age for these fish families and saw that fish  
465 heterozygous for either the *T141\_L142delinsMISLISV* or *N140fs* mutation appear  
466 similar to wild type fish in surface pigmentation but that homozygous  
467 *T141\_L142delinsMISLISV* fish have much fainter melanotic pigmentation, with many  
468 faintly melanotic cells arranged in apparently normal stripes (Fig 5B). In contrast,  
469 homozygous *N140fs* fish apparently lack surface melanotic stripes (although a very  
470 faint impression of striping is still visible, Fig 5C). Subsequent generation of

471 homozygous lines of fish homozygous for both mutations showed that their reduced  
472 melanotic pigmentation phenotypes are consistent and that the mutations do not cause  
473 sterility. Since  $\gamma$ -secretase activity is required for melanin formation (20, 25), and  
474 *psen2* appears relatively highly expressed in melanophores (33) it is likely that *N140fs*  
475 homozygous fish lack melanin due to absence of  $\gamma$ -secretase activity from *psen2* while  
476 *T141\_L142delinsMISLISV* homozygous fish retain low levels of *psen2*-derived  
477  $\gamma$ -secretase activity.

478

479 **Fig 5. Surface melanotic pigmentation phenotypes.**

480 (A) Patches of pigmentation loss in the skin of mosaic mutant G0 fish.

481 (B) *T141\_L142delinsMISLISV* mutants and +/+ sibling fish.

482 (C) *N140fs* mutants and +/+ sibling fish.

483 (D) No gross melanotic pigmentation phenotype was observed in *N140fs* homozygous  
484 embryos at 50 hpf.

485 When stripes of melanotic pigmentation were visible in heterozygous or homozygous  
486 mutant fish, we did not observe obvious differences in the overall pattern of striping  
487 between these and wild type fish (data not shown).

488

489 The intracellular distribution of pigment also appeared to change with age in the skin  
490 melanophores of *T141\_L142delinsMISLISV* homozygous fish. At two months of age  
491 pigment appeared evenly distributed in these cells but excluded from their central,  
492 presumably nuclear, regions (Fig 5B). However, by six months of age, the pigment

493 appeared concentrated at the centre of cells and was, presumably, perinuclear. The  
494 density of pigment formation in heterozygous and wild type fish made it difficult to  
495 see whether a similar phenomenon was also occurring in those.

496

497 Curiously, the *NI40fs* homozygous fish lacking surface melanotic pigmentation  
498 retained strong melanotic pigmentation in their retinal pigmented epithelium. This is  
499 obvious as the dark eyes of the fish shown in Fig 5C and was confirmed by dissection  
500 of these eyes (not shown). Also, all the 48 hpf larval *NI40fs* homozygous progeny of  
501 homozygous parents showed abundant surface melanophores that cannot be due to  
502 maternal inheritance of wild type *psen2* function (Fig 5D). Thus, the dependence of  
503 zebrafish adult skin melanotic pigmentation on *psen2* function is both cell type- and  
504 age-specific.

505

## 506 **Discussion**

507

508 Our attempts at generation of point mutations in the zebrafish *psen2* gene by HDR  
509 were unsuccessful. However, we did succeed in identifying two mutations (formed by  
510 the NHEJ pathway) that may prove useful in analysing the role of the human *PSEN2*  
511 gene in familial Alzheimer's disease; an in-frame mutation,  
512 *T141\_L142delinsMISLISV*, and a frame-shift mutation, *NI40fs*. While the CRISPR  
513 Cas9 system can produce off-target effects (54) these are unlikely to have influenced  
514 out results since use of this system in zebrafish requires outbreeding of fish that



515 typically segregates away second-site mutations (other than those tightly linked to the  
516 target mutation site). Also, the severity of the phenotypic effects observed corresponds  
517 to the severity of the effects of the mutations on the structure of the putative encoded  
518 proteins. It is also unlikely that two off-target mutation events would both affect  
519 pigmentation. Lastly, the effects of mutations in zebrafish *psen2* upon pigmentation  
520 are consistent with what is known about the subcellular localization of PSEN2 protein  
521 in mammalian systems (10).

522

523 The in-frame mutation *T141\_L142delinsMISLISV* is an indel mutation altering two  
524 codons and inserting an additional 5 codons. Although this mutation changes the  
525 length of the protein coding sequence, the predicted protein hydropathicity plot of the  
526 putative mutant protein (Fig 2) supports that the mutation does not completely destroy  
527 the transmembrane structure of *Psen2*. Since most of the fAD mutations in human  
528 *PSEN2* are in-frame mutations that may change hydropathicity without destroying the  
529 overall transmembrane structure of the protein (4), the *T141\_L142delinsMISLISV*  
530 mutation would appear to be more fAD-like than null.

531

532 The frame-shift mutation *N140fs* was caused by a deletion of 7 nucleotides and results  
533 in a PTC at the 142<sup>nd</sup> codon position. This mutation causes truncation of the coding  
534 sequence at the upstream end of TMD2 of zebrafish *Psen2*. The first two TMDs of  
535 human PSEN2 are thought to be necessary for ER localisation (11). Since coding  
536 sequence truncation occurs at the upstream end of TMD2, if this mutant allele

537 expressed a protein, it would most likely not be able to form TMD structures for ER  
538 localization. Neither could it possibly have  $\gamma$ -secretase activity since it lacks the  
539 aspartate residues required (41, 42). Moreover, since dqPCR showed that the levels of  
540 *NI40fs* transcripts are only approximately 25% of those for wild type transcripts in  
541 heterozygous mutant brains, *NI40fs* expression appears limited by NMD (a fact  
542 supported by the ~5-fold increased N140fs transcript level in the presence of the  
543 translation inhibitor, cycloheximide (S4 File). Our previous work has shown that  
544 zebrafish *psen2* does not express a truncated isoform equivalent to the PS2V isoform  
545 of human *PSEN2* (39) and that a PS2V-like truncation of zebrafish Psen2 does not  
546 have PS2V-like activity (55). (Instead a PS2V-like function is expressed from  
547 zebrafish *psen1* (55)). Therefore, *NI40fs* most likely represents a true null (or severely  
548 hypomorphic) allele of zebrafish *psen2*, unlike another frameshift mutation, *S4Ter*,  
549 that we recently analysed and that shows grossly normal adult pigmentation (Jiang et  
550 al., manuscript submitted).

551

552 There is a considerable weight of evidence supporting the importance of hypoxia in  
553 the development of AD (reviewed by (56)) and zebrafish represent a very versatile  
554 system for investigating the effects of hypoxia (39, 51, 55). In human cells,  
555 expression of the fAD genes *APP*, *PSENI* and *PSEN2* genes can be upregulated by  
556 hypoxia (51) and we previously showed that this phenomenon has been conserved  
557 during the nearly half a billion years since the divergence of the zebrafish and human  
558 evolutionary lineages (51). In that earlier paper we saw nearly a two-fold increase in

559 zebrafish brain *psen2* mRNA levels under hypoxia compared to normoxia while, in  
560 this work, no significant differences were seen (except for *NI40fs* allele transcripts  
561 where hypoxia may be inhibiting NMD (53)). Upon checking our laboratory records  
562 we found that the fish used in the earlier publication were around 12 months old  
563 compared to the six months of age in this work. In other, yet unpublished work we  
564 have observed that differences in adult age make very significant differences to brain  
565 transcriptional responses to hypoxia with young adult fish showing the mildest  
566 responses (Newman et al. unpublished results).

567

568 In previous research we showed that blockage of *psen2* function using morpholino  
569 antisense nucleotides injected into zebrafish zygotes increases the number of DoLA  
570 neurons at 24 hpf (57). Despite the evidence that the *NI40fs* mutation is null, we did  
571 not see increased DoLA neuron numbers in *NI40fs* homozygous embryos at 24 hpf  
572 (See S3 Files for experiment description and data). The observation of differing  
573 developmental phenotypes from decreased gene function due to mutation or  
574 morpholino injection is a common occurrence (58). It is thought to be due to the  
575 phenomenon of “genetic compensation” whereby only decreased gene function  
576 through mutation, (and not by morpholino injection), causes compensatory  
577 upregulation of other genes with similar activities (59). It is likely that genetic  
578 compensation is causing the lack of response of DoLA neuron number to the *NI40fs*  
579 mutation. An alternative explanation would be a maternal contribution of wild type  
580 *psen2* activity from the heterozygous *NI40fs* mother of the embryos examined.

581 Further experimentation such as blockage of *psen1* translation by morpholino  
582 injection into *NI40fs* homozygous embryos or analysis of DoLA numbers in *NI40fs*  
583 homozygous embryos from homozygous parents might resolve this question.

584

585 The visually striking surface pigmentation pattern of zebrafish and the genetic utility  
586 of this organism has made it a focus for research on the genetic control of pigment  
587 formation (60), pigment cell differentiation (61), and surface pigmentation pattern  
588 formation (62). Skin pigmentation pattern is severely affected in adult fish  
589 homozygous for the mutation *T141\_L142delinsMISLISV*. These fish show surface  
590 melanotic stripes that appear approximately the same width as in wild type fish but  
591 are much fainter. Closer examination of these stripes at 6 months of age reveals cells  
592 with vestigial, and likely perinuclear, pigment. The number of cells is not obviously  
593 affected, only the pigmentation they show. Thus, loss of *psen2* function does not  
594 appear to affect melanophore viability (although, in an animal as highly regenerative  
595 as the zebrafish, further tests would be required to conclude this with certainty). By  
596 extrapolation it appears likely that *NI40fs* homozygous adult fish still possess skin  
597 melanophores but that these lack melanin. The retention of some adult skin melanin  
598 formation in *T141\_L142delinsMISLISV* homozygotes but not *NI40fs* homozygotes,  
599 and the roles played in melanosome formation and function particularly by  
600 PSEN2-derived  $\gamma$ -secretase activity (10, 28), support that *T141\_L142delinsMISLISV*  
601 mutant *Psen2* protein molecules retain some level of  $\gamma$ -secretase activity. (Indeed,  
602 Sannerud et al (10) observed that loss of *PSEN2* activity in a human melanoma cell

603 line, MNT1, greatly reduced  $\gamma$ -secretase cleavage of tyrosinase-related protein (TRP1)  
604 and premelanosome protein (PMEL) that are important for melanosome function.)  
605 This supports that the *T141\_L142delinsMISLISV* mutation of zebrafish *Psen2* does not  
606 seriously disrupt the protein's overall pattern of folding for membrane insertion, but  
607 does distort its conformation sufficiently to reduce  $\gamma$ -secretase activity. Partial loss of  
608  $\gamma$ -secretase activity is a commonly observed characteristic of fAD-like mutations in  
609 *PRESENILIN* genes. For example, mouse skin completely lacking expression of wild  
610 type *Psen1* and *Psen2* genes but with a single knock-in M146V fAD-like allele of  
611 *Psen1* show lighter skin and coat colour than similar mice possessing a single wild  
612 type allele of *Psen1* (20). These data, and the fact that the *T141\_L142delinsMISLISV*  
613 mutation obeys the "fAD mutation reading frame preservation rule" (7), support that  
614 this mutation should be investigated for its utility in zebrafish-based fAD research.

615

616 Intriguingly, only the melanotic pigmentation of adult zebrafish skin is dependent on  
617 *psen2* function while larvae and cells of the retinal pigmented epithelium do not show  
618 this dependency. In mammalian systems, most melanin synthesis in the retinal  
619 pigmented epithelium occurs during embryogenesis (63). However, maternal  
620 inheritance of wild type *psen2* mRNA acting during zebrafish embryo formation  
621 cannot explain the pigmented melanophores of larvae or the pigmentation in adult  
622 retinas of *NI40fs* homozygotes since this pigmentation is observed in the progeny of  
623 homozygous mutant parents. The pigmentation likely indicates that the *Psen1* protein  
624 (or, possibly, another protein with  $\gamma$ -secretase-like activity (7)) contributes to normal

625 melanosome formation in the melanophores of embryos/larvae and in the retinal  
626 pigmented epithelium of zebrafish. That different PRESENILIN proteins might  
627 contribute differentially to melanosome formation in different cells or in the same cell  
628 type at different ages is a level of developmental complexity that has not previously  
629 been appreciated. Alternatively, the skin melanophores of adult fish might, for some  
630 unknown reason, be incapable of genetic compensation (e.g. upregulation of *psen1*  
631 activity when *psen2* activity is lost through mutation). The possibility of cell  
632 type-specificity of genetic compensation has also not previously been considered. The  
633 lack of an obvious larval pigmentation phenotype explains why *psen2* was not  
634 identified by the large mutation screens for developmental phenotypes conducted by  
635 the laboratories of Christiane Nüsslein-Volhard (64) and Wolfgang Driever (65) and  
636 published in 1996.

637

638 In conclusion, we have generated in zebrafish an EOfAD-like mutation,  
639 *T141\_L142delinsMISLISV*, and an apparent null, loss-of-function mutation *NI40fs*.  
640 Since none of the over 200 human fAD mutations in *PSEN1* and *PSEN2* are obviously  
641 null alleles, these two zebrafish mutations may prove useful for defining the brain  
642 gene regulatory and other molecular changes that are particular to fAD mutations in  
643 the *PRESENILIN* genes. Our future work will use these and other zebrafish mutation  
644 models to dissect how fAD-like mutations contribute to Alzheimer's disease. Also,  
645 Higdon et al (66) showed that it is possible to use cell-sorting techniques on  
646 disassociated zebrafish embryos to isolate relatively pure populations of their different

647 pigment cells types. These were subsequently characterised transcriptomically.  
648 Extension of these technologies to larval, retinal, and adult tissues would allow more  
649 detailed analysis of the differences between the melanotic cells of these stages and  
650 tissues to determine why they are differentially dependent on *psen2* activity for  
651 melanosome formation and function.

652

### 653 **Acknowledgments**

654 The authors wish to thank Seyyed Hani Moussavi Nik for kind assistance in adjusting  
655 the conditions for the dqPCR.

656

### 657 **References**

658

- 659 1. alz.co.uk. World Alzheimer Report 2014: Dementia and Risk Reduction. Alzheimer's Disease  
660 International; 2014.
- 661 2. Campion D, Dumanchin C, Hannequin D, Dubois B, Belliard S, Puel M, et al. Early-Onset  
662 Autosomal Dominant Alzheimer Disease: Prevalence, Genetic Heterogeneity, and Mutation Spectrum.  
663 The American Journal of Human Genetics.65(3):664-70.
- 664 3. Guerreiro R, Hardy J. Genetics of Alzheimer's disease. Neurotherapeutics. 2014;11(4):732-7.
- 665 4. Jayadev S, Leverenz JB, Steinbart E, Stahl J, Klunk W, Yu CE, et al. Alzheimer's disease phenotypes  
666 and genotypes associated with mutations in presenilin 2. Brain. 2010;133(Pt 4):1143-54.
- 667 5. Scherzer CR, Offe K, Gearing M, Rees HD, Fang G, Heilman CJ, et al. Loss of apolipoprotein E  
668 receptor LR11 in Alzheimer disease. Arch Neurol. 2004;61(8):1200-5.
- 669 6. Pottier C, Hannequin D, Coutant S, Rovelet-Lecrux A, Wallon D, Rousseau S, et al. High frequency  
670 of potentially pathogenic SORL1 mutations in autosomal dominant early-onset Alzheimer disease. Mol  
671 Psychiatry. 2012;17(9):875-9.
- 672 7. Jayne T, Newman M, Verdile G, Sutherland G, Munch G, Musgrave I, et al. Evidence For and  
673 Against a Pathogenic Role of Reduced gamma-Secretase Activity in Familial Alzheimer's Disease. J  
674 Alzheimers Dis. 2016;52(3):781-99.
- 675 8. Jumpertz T, Rennhack A, Ness J, Baches S, Pietrzik CU, Bulic B, et al. Presenilin is the molecular  
676 target of acidic gamma-secretase modulators in living cells. PLoS ONE. 2012;7(1):6.
- 677 9. Area-Gomez E, de Groof AJ, Boldogh I, Bird TD, Gibson GE, Koehler CM, et al. Presenilins are  
678 enriched in endoplasmic reticulum membranes associated with mitochondria. Am J Pathol.

- 679 2009;175(5):1810-6.
- 680 10. Sannerud R, Esselens C, Ejsmont P, Mattera R, Rochin L, Tharkeshwar AK, et al. Restricted  
681 Location of PSEN2/gamma-Secretase Determines Substrate Specificity and Generates an Intracellular  
682 Abeta Pool. *Cell*. 2016;166(1):193-208.
- 683 11. Tomita T, Tokuhiko S, Hashimoto T, Aiba K, Saido TC, Maruyama K, et al. Molecular dissection of  
684 domains in mutant presenilin 2 that mediate overproduction of amyloidogenic forms of amyloid beta  
685 peptides. Inability of truncated forms of PS2 with familial Alzheimer's disease mutation to increase  
686 secretion of Abeta42. *J Biol Chem*. 1998;273(33):21153-60.
- 687 12. Bissig C, Rochin L, van Niel G. PMEL Amyloid Fibril Formation: The Bright Steps of Pigmentation.  
688 *Int J Mol Sci*. 2016;17(9).
- 689 13. Schraermeyer U, Peters S, Thumann G, Kociok N, Heimann K. Melanin granules of retinal pigment  
690 epithelium are connected with the lysosomal degradation pathway. *Exp Eye Res*. 1999;68(2):237-45.
- 691 14. Wasmeier C, Hume AN, Bolasco G, Seabra MC. Melanosomes at a glance. *J Cell Sci*. 2008;121(Pt  
692 24):3995-9.
- 693 15. Levy-Lahad E, Wasco W, Poorkaj P, Romano DM, Oshima J, Pettingell WH, et al. Candidate gene  
694 for the chromosome 1 familial Alzheimer's disease locus. *Science*. 1995;269(5226):973-7.
- 695 16. Hardy J. Amyloid, the presenilins and Alzheimer's disease. *Trends in Neurosciences*. 1997  
696 1997/05/01;20(4):154-9.
- 697 17. Adzhubei IA, Schmidt S, Peshkin L, Ramensky VE, Gerasimova A, Bork P, et al. A method and  
698 server for predicting damaging missense mutations: *Nat Methods*. 2010 Apr;7(4):248-9. doi:  
699 10.1038/nmeth0410-248.
- 700 18. Tomita T, Maruyama K, Saido TC, Kume H, Shinozaki K, Tokuhiko S, et al. The presenilin 2 mutation  
701 (N141I) linked to familial Alzheimer disease (Volga German families) increases the secretion of amyloid  
702  $\beta$  protein ending at the 42nd (or 43rd) residue. *Proceedings of the National Academy of Sciences*.  
703 1997 March 4, 1997;94(5):2025-30.
- 704 19. Toda T, Noda Y, Ito G, Maeda M, Shimizu T. Presenilin-2 Mutation Causes Early Amyloid  
705 Accumulation and Memory Impairment in a Transgenic Mouse Model of Alzheimer's Disease. *Journal*  
706 *of Biomedicine and Biotechnology*. 2011;2011.
- 707 20. Wang R, Tang P, Wang P, Boissy RE, Zheng H. Regulation of tyrosinase trafficking and processing  
708 by presenilins: partial loss of function by familial Alzheimer's disease mutation. *Proc Natl Acad Sci U S*  
709 *A*. 2006;103(2):353-8.
- 710 21. Tief K, Hahne M, Schmidt A, Beermann F. Tyrosinase, the key enzyme in melanin synthesis, is  
711 expressed in murine brain. *Eur J Biochem*. 1996;241(1):12-6.
- 712 22. del Marmol V, Beermann F. Tyrosinase and related proteins in mammalian pigmentation. *FEBS*  
713 *Lett*. 1996;381(3):165-8.
- 714 23. Vetrivel KS, Zhang Y-w, Xu H, Thinakaran G. Pathological and physiological functions of presenilins.  
715 *Molecular Neurodegeneration*. [journal article]. 2006 June 12;1(1):4.
- 716 24. Watt B, van Niel G, Raposo G, Marks MS. PMEL: a pigment cell-specific model for functional  
717 amyloid formation. *Pigment Cell Melanoma Res*. 2013;26(3):300-15.
- 718 25. Kummer MP, Maruyama H, Huelsmann C, Baches S, Weggen S, Koo EH. Formation of Pmel17  
719 amyloid is regulated by juxtamembrane metalloproteinase cleavage, and the resulting C-terminal  
720 fragment is a substrate for gamma-secretase. *J Biol Chem*. 2009;284(4):2296-306.
- 721 26. Raposo G, Marks MS. Melanosomes--dark organelles enlighten endosomal membrane transport.  
722 *Nat Rev Mol Cell Biol*. 2007;8(10):786-97.



- 723 27. Fowler DM, Koulov AV, Alory-Jost C, Marks MS, Balch WE, Kelly JW. Functional Amyloid  
724 Formation within Mammalian Tissue. *PLoS Biology*. 2005;4(1):e6.
- 725 28. Rochin L, Hurbain I, Serneels L, Fort C, Watt B, Leblanc P, et al. BACE2 processes PMEL to form the  
726 melanosome amyloid matrix in pigment cells. *Proc Natl Acad Sci U S A*. 2013;110(26):10658-63.
- 727 29. Hin N, Newman M, Kaslin J, Douek AM, Lumsden A, Zhou X-F, et al. Accelerated brain aging  
728 towards transcriptional inversion in a zebrafish model of familial Alzheimer's disease. *bioRxiv*.  
729 [10.1101/262162]. 2018.
- 730 30. Postlethwait JH, Woods IG, Ngo-Hazelett P, Yan Y-L, Kelly PD, Chu F, et al. Zebrafish Comparative  
731 Genomics and the Origins of Vertebrate Chromosomes. *Genome Research*. 2000 December 1,  
732 2000;10(12):1890-902.
- 733 31. Ravi V, Venkatesh B. Rapidly evolving fish genomes and teleost diversity. *Current Opinion in*  
734 *Genetics & Development*. 2008;18(6):544-50.
- 735 32. Leimer U, Lun K, Romig H, Walter J, Grünberg J, Brand M, et al. Zebrafish (*Danio rerio*) Presenilin  
736 Promotes Aberrant Amyloid  $\beta$ -Peptide Production and Requires a Critical Aspartate Residue for Its  
737 Function in Amyloidogenesis†. *Biochemistry*. 1999 1999/10/01;38(41):13602-9.
- 738 33. Groth C, Nornes S, McCarty R, Tamme R, Lardelli M. Identification of a second presenilin gene in  
739 zebrafish with similarity to the human Alzheimer's disease gene presenilin2. *Dev Genes Evol*. 2002  
740 2002/11/01;212(10):486-90.
- 741 34. Bassett A, Liu J-L. CRISPR/Cas9 mediated genome engineering in *Drosophila*. *Methods*. 2014  
742 2014/09/01;69(2):128-36.
- 743 35. Bassett AR, Liu J-L. CRISPR/Cas9 and Genome Editing in *Drosophila*. *Journal of Genetics and*  
744 *Genomics*. 2014 2014/01/20;41(1):7-19.
- 745 36. Meeker ND, Hutchinson SA, Ho L, Trede NS. Method for isolation of PCR-ready genomic DNA  
746 from zebrafish tissues. *Biotechniques*. 2007;43(5):614.
- 747 37. Bibikova M, Golic M, Golic KG, Carroll D. Targeted chromosomal cleavage and mutagenesis in  
748 *Drosophila* using zinc-finger nucleases. *Genetics*. 2002;161(3):1169-75.
- 749 38. Babon JJ, McKenzie M, Cotton RGH. The use of resolvases T4 endonuclease VII and T7  
750 endonuclease I in mutation detection. *Molecular Biotechnology*. [journal article]. 2003 January  
751 01;23(1):73-81.
- 752 39. Moussavi Nik SH, Newman M, Lardelli M. The response of HMGA1 to changes in oxygen  
753 availability is evolutionarily conserved. *Exp Cell Res*. 2011;317(11):1503-12.
- 754 40. Gasteiger E, Hoogland C, Gattiker A, Wilkins MR, Appel RD, Bairoch A. Protein identification and  
755 analysis tools on the ExPASy server. *The proteomics protocols handbook*: Springer; 2005. p. 571-607.
- 756 41. Fraering PC. Structural and Functional Determinants of gamma-Secretase, an Intramembrane  
757 Protease Implicated in Alzheimer's Disease. *Curr Genomics*. 2007;8(8):531-49.
- 758 42. Wolfe MS, Xia W, Ostaszewski BL, Diehl TS, Kimberly WT, Selkoe DJ. Two transmembrane  
759 aspartates in presenilin-1 required for presenilin endoproteolysis and gamma-secretase activity.  
760 *Nature*. 1999;398(6727):513-7.
- 761 43. Chang YF, Imam JS, Wilkinson MF. The nonsense-mediated decay RNA surveillance pathway.  
762 *Annu Rev Biochem*. 2007;76:51-74.
- 763 44. Carter MS, Doskow J, Morris P, Li S, Nhim RP, Sandstedt S, et al. A regulatory mechanism that  
764 detects premature nonsense codons in T-cell receptor transcripts in vivo is reversed by protein  
765 synthesis inhibitors in vitro. *J Biol Chem*. 1995;270(48):28995-9003.
- 766 45. Hurt JA, Robertson AD, Burge CB. Global analyses of UPF1 binding and function reveal expanded

- 767 scope of nonsense-mediated mRNA decay. *Genome Res.* 2013;23(10):1636-50.
- 768 46. Salminen A, Kauppinen A, Kaarniranta K. Hypoxia/ischemia activate processing of Amyloid  
769 Precursor Protein: impact of vascular dysfunction in the pathogenesis of Alzheimer's disease. *Journal*  
770 *of Neurochemistry.* 2017;140(4):536-49.
- 771 47. Nishikawa A, Manabe T, Katayama T, Kudo T, Matsuzaki S, Yanagita T, et al. Novel function of PS2V:  
772 change in conformation of tau proteins. *Biochem Biophys Res Commun.* 2004;318(2):435-8.
- 773 48. De Gasperi R, Sosa MA, Dracheva S, Elder GA. Presenilin-1 regulates induction of hypoxia  
774 inducible factor-1alpha: altered activation by a mutation associated with familial Alzheimer's disease.  
775 *Mol Neurodegener.* 2010;5(38):1750-326.
- 776 49. Sato N, Hori O, Yamaguchi A, Lambert JC, Chartier-Harlin MC, Robinson PA, et al. A novel  
777 presenilin-2 splice variant in human Alzheimer's disease brain tissue. *J Neurochem.*  
778 1999;72(6):2498-505.
- 779 50. Zhang X, Zhou K, Wang R, Cui J, Lipton SA, Liao F-F, et al. Hypoxia-inducible Factor 1 $\alpha$   
780 (HIF-1 $\alpha$ )-mediated Hypoxia Increases BACE1 Expression and  $\beta$ -Amyloid Generation. *Journal of*  
781 *Biological Chemistry.* 2007 April 13, 2007;282(15):10873-80.
- 782 51. Moussavi Nik SH, Wilson L, Newman M, Croft K, Mori TA, Musgrave I, et al. The  
783 BACE1-PSEN-AbetaPP regulatory axis has an ancient role in response to low oxygen/oxidative stress. *J*  
784 *Alzheimers Dis.* 2012;28(3):515-30.
- 785 52. Detrich III HW, Zon LI, Westerfield M. *Essential zebrafish methods: Genetics and genomics:*  
786 *Academic Press; 2009.*
- 787 53. Gardner LB. Hypoxic Inhibition of Nonsense-Mediated RNA Decay Regulates Gene Expression and  
788 the Integrated Stress Response. *Molecular and Cellular Biology.* 2008 June 1, 2008;28(11):3729-41.
- 789 54. Zhang X-H, Tee LY, Wang X-G, Huang Q-S, Yang S-H. Off-target Effects in CRISPR/Cas9-mediated  
790 Genome Engineering. *Molecular Therapy - Nucleic Acids.* 2015 2015/01/01/;4:e264.
- 791 55. Moussavi Nik SH, Newman M, Wilson L, Ebrahimie E, Wells S, Musgrave I, et al. Alzheimer's  
792 disease-related peptide PS2V plays ancient, conserved roles in suppression of the unfolded protein  
793 response under hypoxia and stimulation of gamma-secretase activity. *Hum Mol Genet.* 2015;26.
- 794 56. Love S, Miners JS. Cerebral Hypoperfusion and the Energy Deficit in Alzheimer's Disease. *Brain*  
795 *Pathol.* 2016;26(5):607-17.
- 796 57. Nornes S, Newman M, Wells S, Verdile G, Martins RN, Lardelli M. Independent and cooperative  
797 action of Psen2 with Psen1 in zebrafish embryos. *Experimental Cell Research.* 2009  
798 2009/10/01/;315(16):2791-801.
- 799 58. Kok FO, Shin M, Ni CW, Gupta A, Grosse AS, van Impel A, et al. Reverse genetic screening reveals  
800 poor correlation between morpholino-induced and mutant phenotypes in zebrafish. *Dev Cell.*  
801 2015;32(1):97-108.
- 802 59. Rossi A, Kontarakis Z, Gerri C, Nolte H, Hölper S, Krüger M, et al. Genetic compensation induced  
803 by deleterious mutations but not gene knockdowns. *Nature.* 2015;524:230.
- 804 60. Navarro RE, Ramos-Balderas JL, Guerrero I, Pelcastre V, Maldonado E. Pigment dilution mutants  
805 from fish models with connection to lysosome-related organelles and vesicular traffic genes. *Zebrafish.*  
806 2008;5(4):309-18.
- 807 61. Quigley IK, Parichy DM. Pigment pattern formation in zebrafish: a model for developmental  
808 genetics and the evolution of form. *Microsc Res Tech.* 2002;58(6):442-55.
- 809 62. Irion U, Singh AP, Nusslein-Volhard C. The Developmental Genetics of Vertebrate Color Pattern  
810 Formation: Lessons from Zebrafish. *Curr Top Dev Biol.* 2016;117:141-69.

- 811 63. Lopes VS, Wasmeier C, Seabra MC, Futter CE. Melanosome maturation defect in Rab38-deficient  
812 retinal pigment epithelium results in instability of immature melanosomes during transient  
813 melanogenesis. *Mol Biol Cell*. 2007;18(10):3914-27.
- 814 64. Kelsh RN, Brand M, Jiang YJ, Heisenberg CP, Lin S, Haffter P, et al. Zebrafish pigmentation  
815 mutations and the processes of neural crest development. *Development*. 1996;123:369-89.
- 816 65. Driever W, Solnica-Krezel L, Schier AF, Neuhauss SC, Malicki J, Stemple DL, et al. A genetic screen  
817 for mutations affecting embryogenesis in zebrafish. *Development*. 1996;123:37-46.
- 818 66. Higdon CW, Mitra RD, Johnson SL. Gene expression analysis of zebrafish melanocytes,  
819 iridophores, and retinal pigmented epithelium reveals indicators of biological function and  
820 developmental origin. *PLoS ONE*. 2013;8(7).

821

822

## 823 **Supporting information**

824

### 825 **S1 Fig. T7 endonuclease assays and mutation-specific PCRs for embryos at 24**

826 **hpf.**

827 (A) T7 endonuclease I assay for testing the cleavage activity of the CRISPR/Cas9  
828 system.

829 (B) “*N140I*” allele-detection PCR for testing of CRISPR/Cas9 plus “N140I oligo”  
830 co-injected TU embryos. 10 embryos from each injection batch were pooled for these  
831 tests. Both batches of the injected TU embryos showed positive signals in the “N140I”  
832 allele-detection PCR. Therefore, some of these “N140I oligo” injected TU embryos  
833 may have carried the “N140I” allele in the genomes of some cells.

834 (C) “*V147I*” allele-detection PCR for testing the CRISPR/Cas9 plus “V147I oligo”  
835 injected TU embryos. 10 embryos from each batch were pooled for these tests. Both  
836 batches of the injected TU embryos showed positive signals from the “V147I”  
837 allele-detection PCR. Therefore, some of these “V147I oligo” injected TU embryos  
838 may have carried the “V147I” allele in the genomes of some cells.

839 (D) T7 endonuclease I assay for detecting random mutations at the CRISPR/Cas9  
840 target site in the F1 progeny. Tail-clip biopsies from 46 of the F1 progeny from the  
841 CRISPR/Cas9 plus “V147I oligo” injected mosaic G0 fish were tested using the T7  
842 endonuclease I assay to screen for the presence of cells with mutations at the target  
843 site. Only 5 fish showed cleavage patterns indicating the presence of mutations.

844

845 **S2 Fig. Mutation-specific PCR tests of G0 and F1 fish.**

846 (A) “N140I” allele-specific detection PCRs on tail-clip biopsies from G0 fish. Twelve  
847 G0 fish (120 in total) showed positive signals in the “N140I” allele-specific detection  
848 PCR.

849 (B) “N140I” allele-specific detection PCRs from F1 embryos of the G0 mosaic fish  
850 showing “N140I” allele-positive signals. 10 F1 embryos at 24 hpf from each “N140I”  
851 allele-carrying G0 fish were pooled for testing. The F1 progeny from one “N140I”  
852 allele-carrying G0 fish showed a signal at ~400 bp, which may result from imperfect  
853 incorporation of the “N140I oligo” sequence into the target site of the CRISPR/Cas9  
854 system.

855 (C) “V147I” allele-specific PCRs from F1 embryos of the G0 mosaic fish showing  
856 “V147I” allele-positive signals. 10 F1 embryos at 24 hpf from each “V147I” allele  
857 carrying G0 fish were pooled for testing. The F1 progeny from one of the “V147I”  
858 allele-carrying G0 fish showed the same positive signal as the injected G0 embryos.

859 (D) “V147I” allele-specific detection PCR from tail-clip biopsies of F1 fish. Two out  
860 of twelve tested F1 fish (raised from the positive batch of embryos observed above in

861 D) showed positive signals, indicating they might carry the desired “*VI47T*” allele.  
862 (E) “*VI47T*” allele-specific detection PCR using the same forward primer as in (E) but  
863 a different reverse primer binding farther downstream in *psen2* DNA. While the  
864 pooled F1 embryos still gave a positive signal, the two F1 fish no longer showed a  
865 positive signal using this PCR, revealing that the previously seen positive signals (in  
866 E) were artefacts.

867

868 **S3 Fig. DoLA neuron numbers.**

869 DoLA neuron numbers in wild type and *NI40fs* mutant embryos as revealed by *in situ*  
870 hybridisation against *tbx16* transcripts.

871

872 **S4 Fig. dqPCRs detecting wild type and mutant alleles in *NI40fs/+* embryos at 50**  
873 **hpf after two hours of cycloheximide treatment relative to untreated embryos.**

874 (A) In a 20% polyacrylamide gel, amplification of cDNA fragments spanning the  
875 mutation (7 nucleotides shorter than wild type) was only observed in the CHX-treated  
876 group, while only one higher molecular weight band (from the wild type allele) was  
877 observed in the non-treated group. This supports that NMD is destabilising the mutant  
878 transcript in heterozygous embryos.

879 (B) In dqPCR, both the wild type *psen2* allele and the *NI40fs* allele were observed to  
880 be upregulated after the CHX-treatment. The fold change (FC) of the upregulation of  
881 the *NI40fs* allele transcripts (FC=5.601) was significantly higher than that for the wild  
882 type *psen2* allele transcripts (FC=2.373).

883

884 **S1 Table. Allele-specific transcript quantification in six month old**

885 ***T141\_L142delinsMISLISV/+* and wild type sibling brains.** Copies per 25ng of total

886 brain cDNA (assuming complete reverse transcription of total brain RNA).

887

888 **S2 Table. Allele-specific transcript quantification in six month old *NI40fs/+* fish**

889 **and wild type sibling brains.** Copies per 25ng of total brain cDNA (assuming

890 complete reverse transcription of total brain RNA).

891

892 **S3 Table. *In situ* hybridization against *tbx16* transcripts in DoLA neurons.**

893

894 **S4 Table. Allele-specific expression analysis on the *NI40fs/+* embryos**

895 **(non-treated and CHX-treated) at 50 hpf in 25ng of total embryo cDNA.** Copies

896 per 25ng (assuming complete reverse transcription of total RNA).

897

898 **S1 File. Mutation screening and breeding.**

899

900 **S2 File. dqPCR results for allele-specific transcript quantification in six month**

901 **old brains.**

902

903 **S3 File. *In situ* transcript hybridization analysis of DoLA neuron number.**

904

905 **S4 File. Cycloheximide treatment of *NI40fs/+* embryos at 48-50 hpf.**

|         | <b>psen2 wildtype</b>                                                                               |
|---------|-----------------------------------------------------------------------------------------------------|
| cDNA    | TCAGTGGGCCAGCGTCTGCTGAATTTCGGGTGCTCAAC-----ACTCTGGTCAATGATCAGTGTGATTGCTTTCATGACCA                   |
| Protein | S V G Q R L L N S V L N-----T L V M I S V I V F M T                                                 |
|         | <b>psen2 T141_L142delinsMISLISV</b>                                                                 |
| cDNA    | TCAGTGGGCCAGCGTCTGCTGAATTTCGGGTGCTCAAC <b>ATGATCAGTCTGATCAGTGTGGTCAATGATCAGTGTGATTGCTTTCATGACCA</b> |
| Protein | S V G Q R L L N S V L N <b>M I S L I S V</b> V M I S V I V F M T                                    |
|         | <b>psen2 N140fs</b>                                                                                 |
| cDNA    | TCAGTGGGCCAGCGTCTGCTGAATTTCGGGTGCTC-----TGGTCAATGATCAGTGTGATTGCTTTCATGACCA                          |
| Protein | S V G Q R L L N S V L----- <b>W S * S V * L S S * P</b>                                             |

**B**

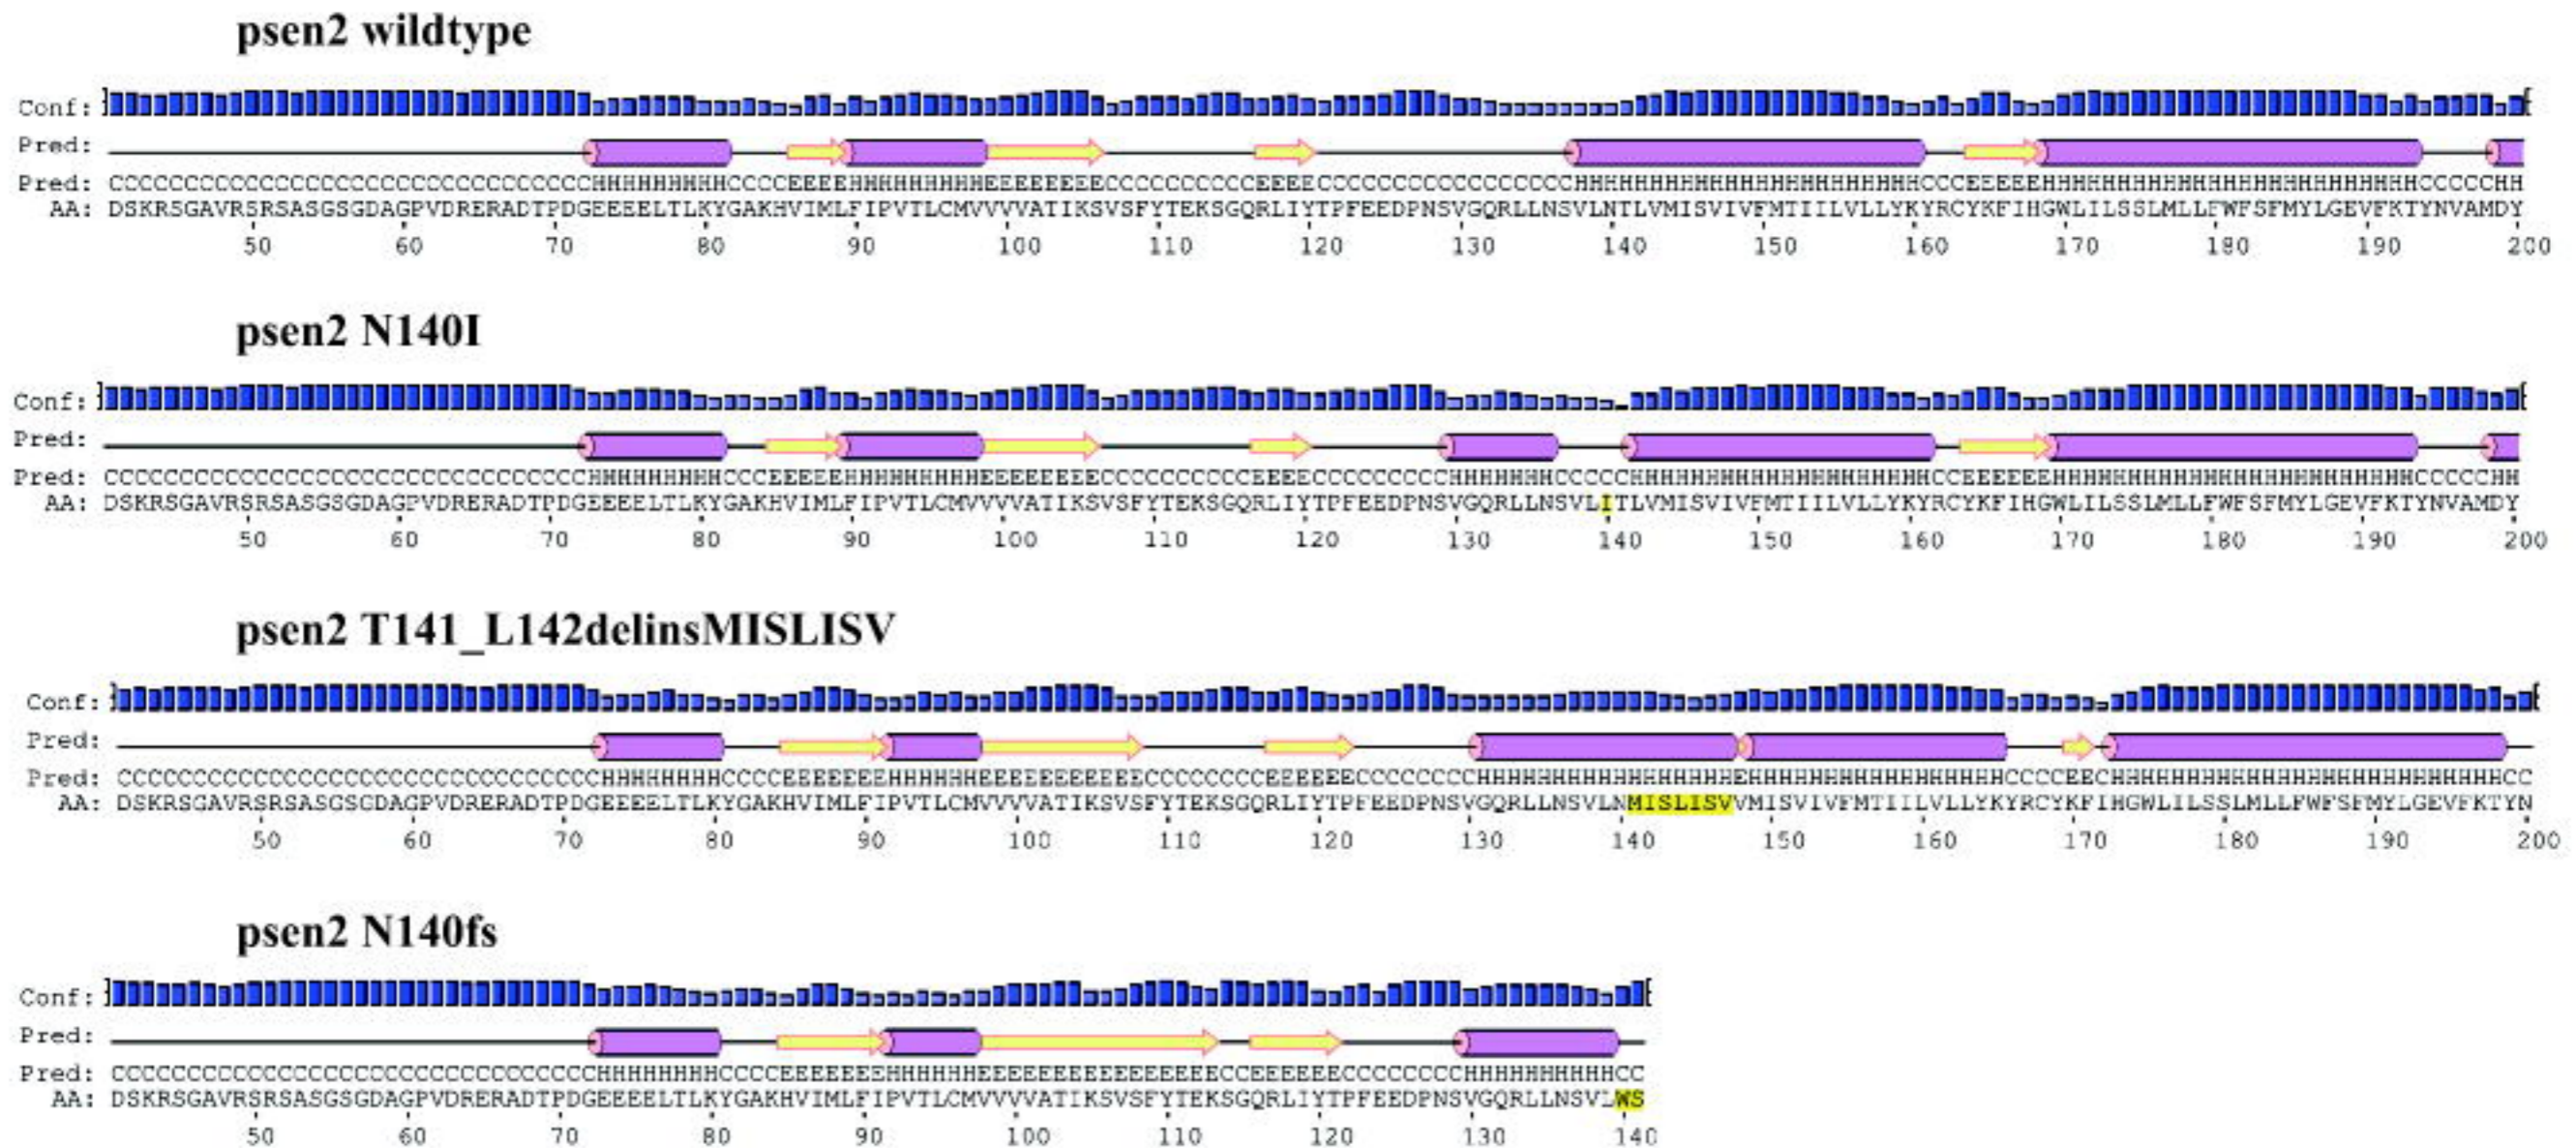



**A**

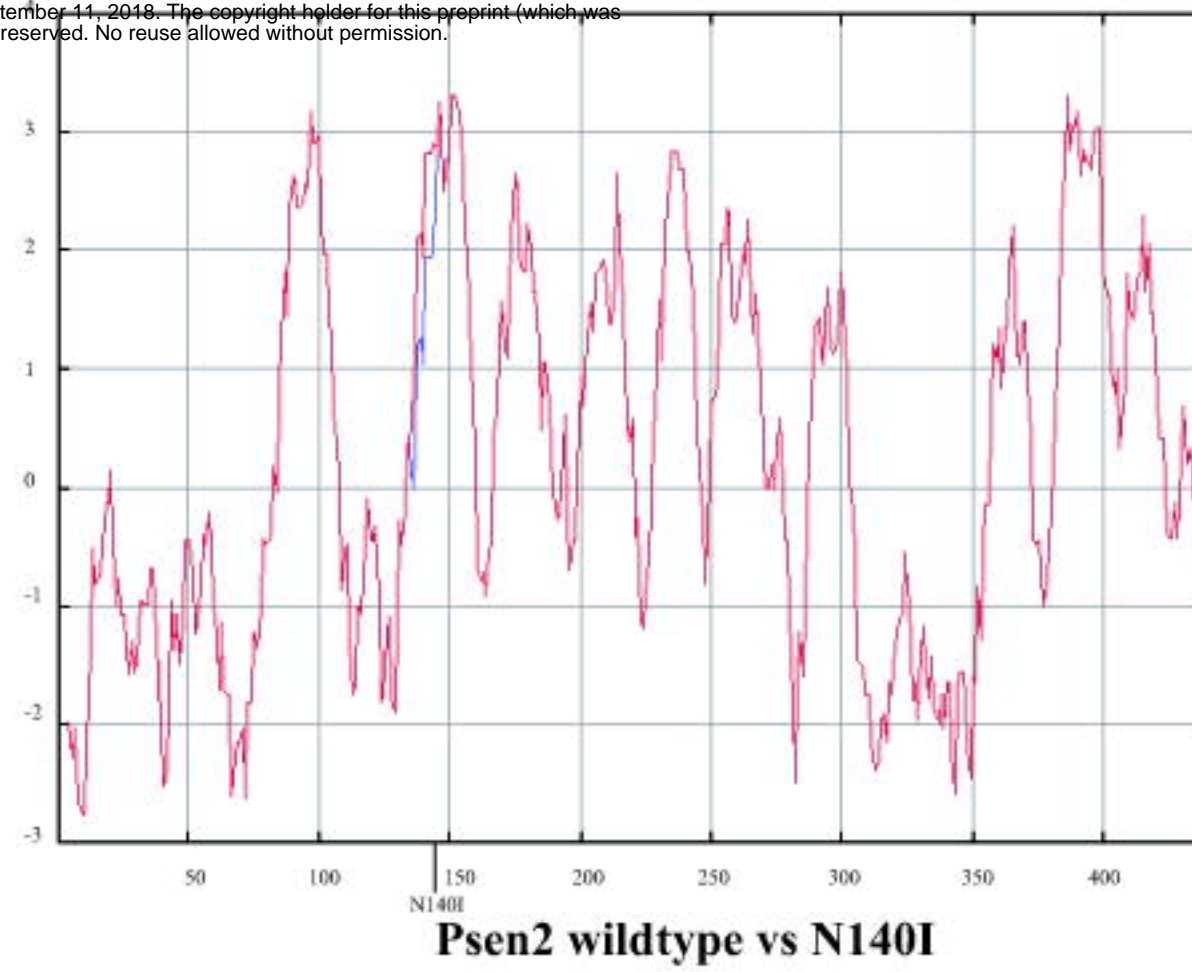

**B**

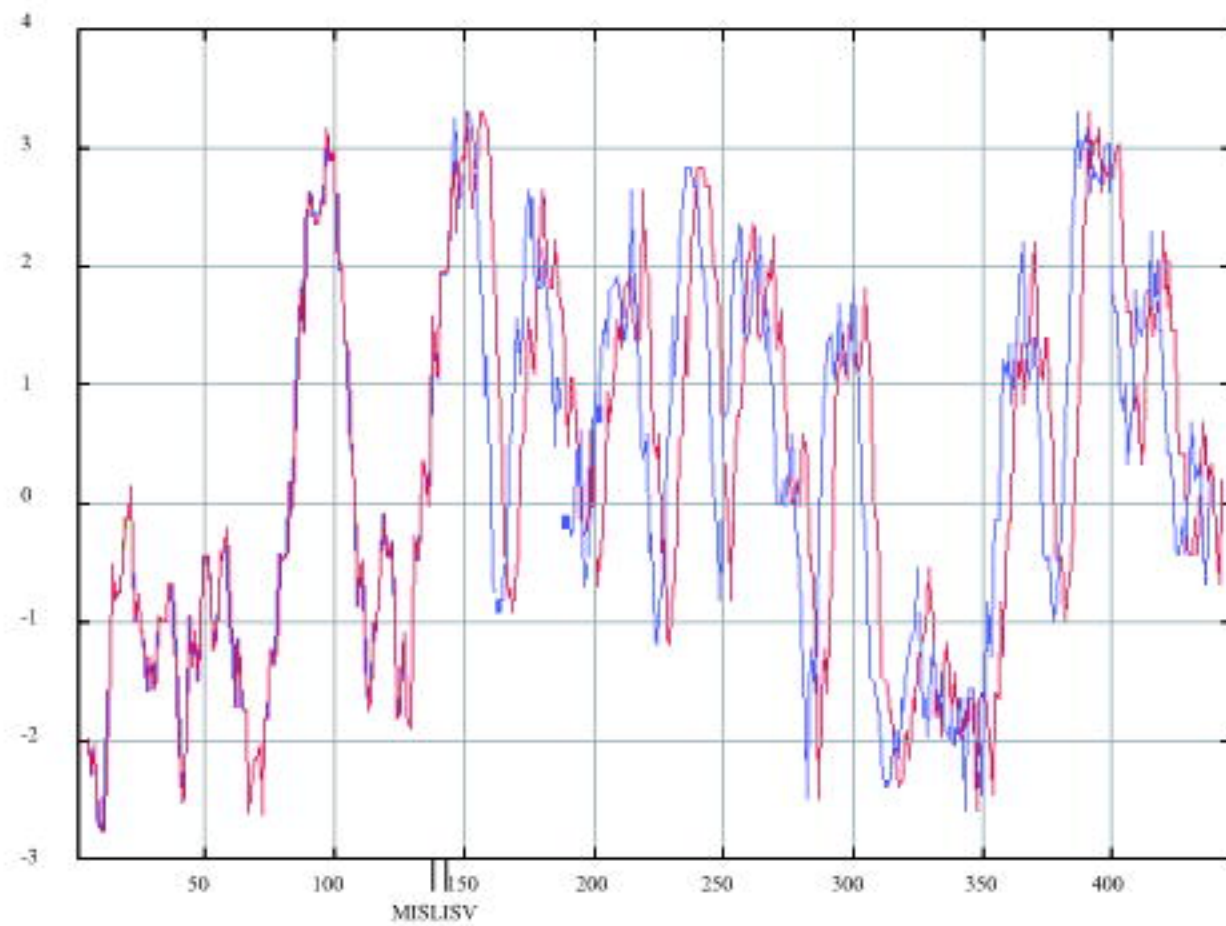

**C**

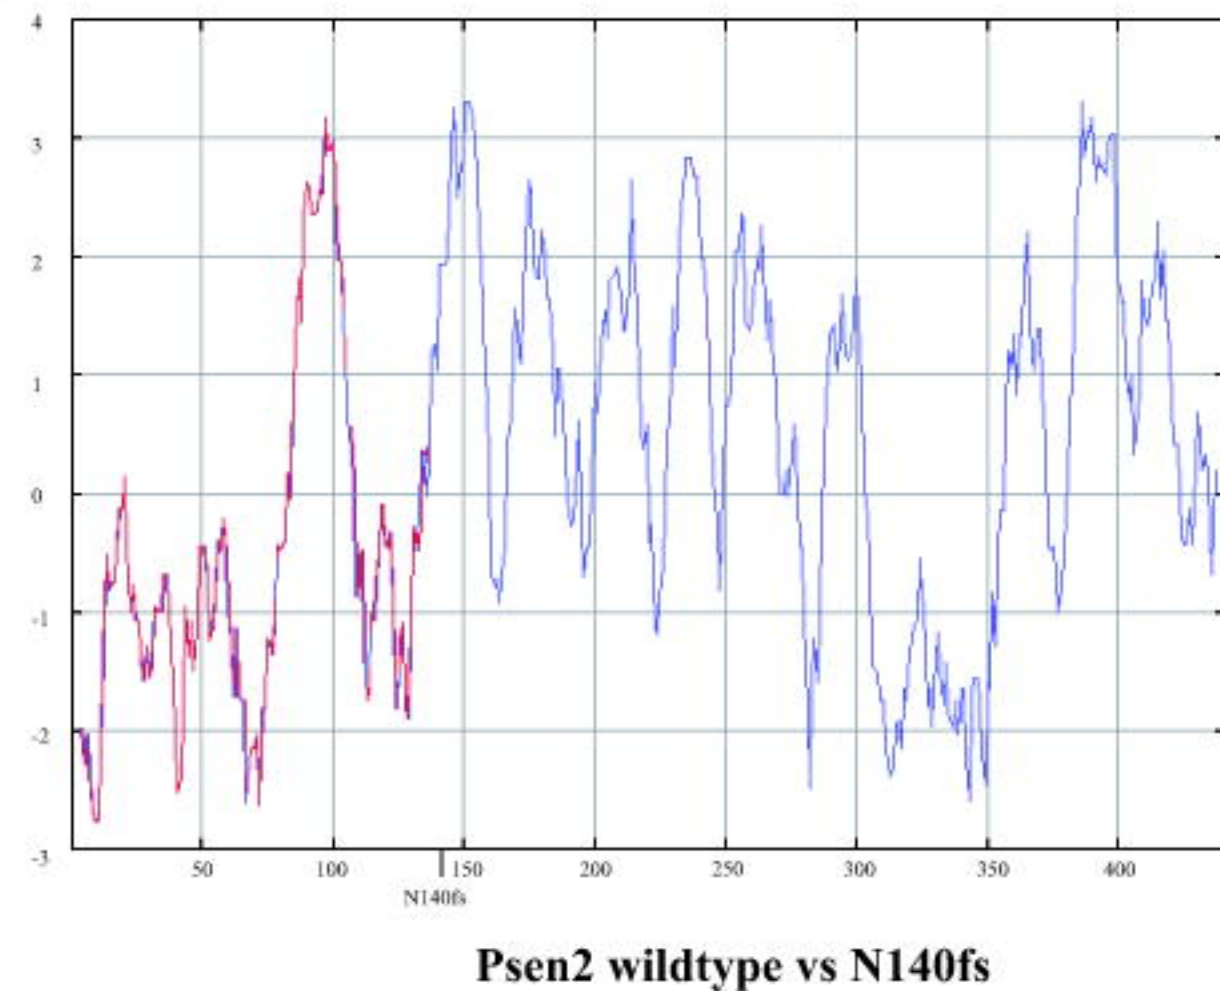

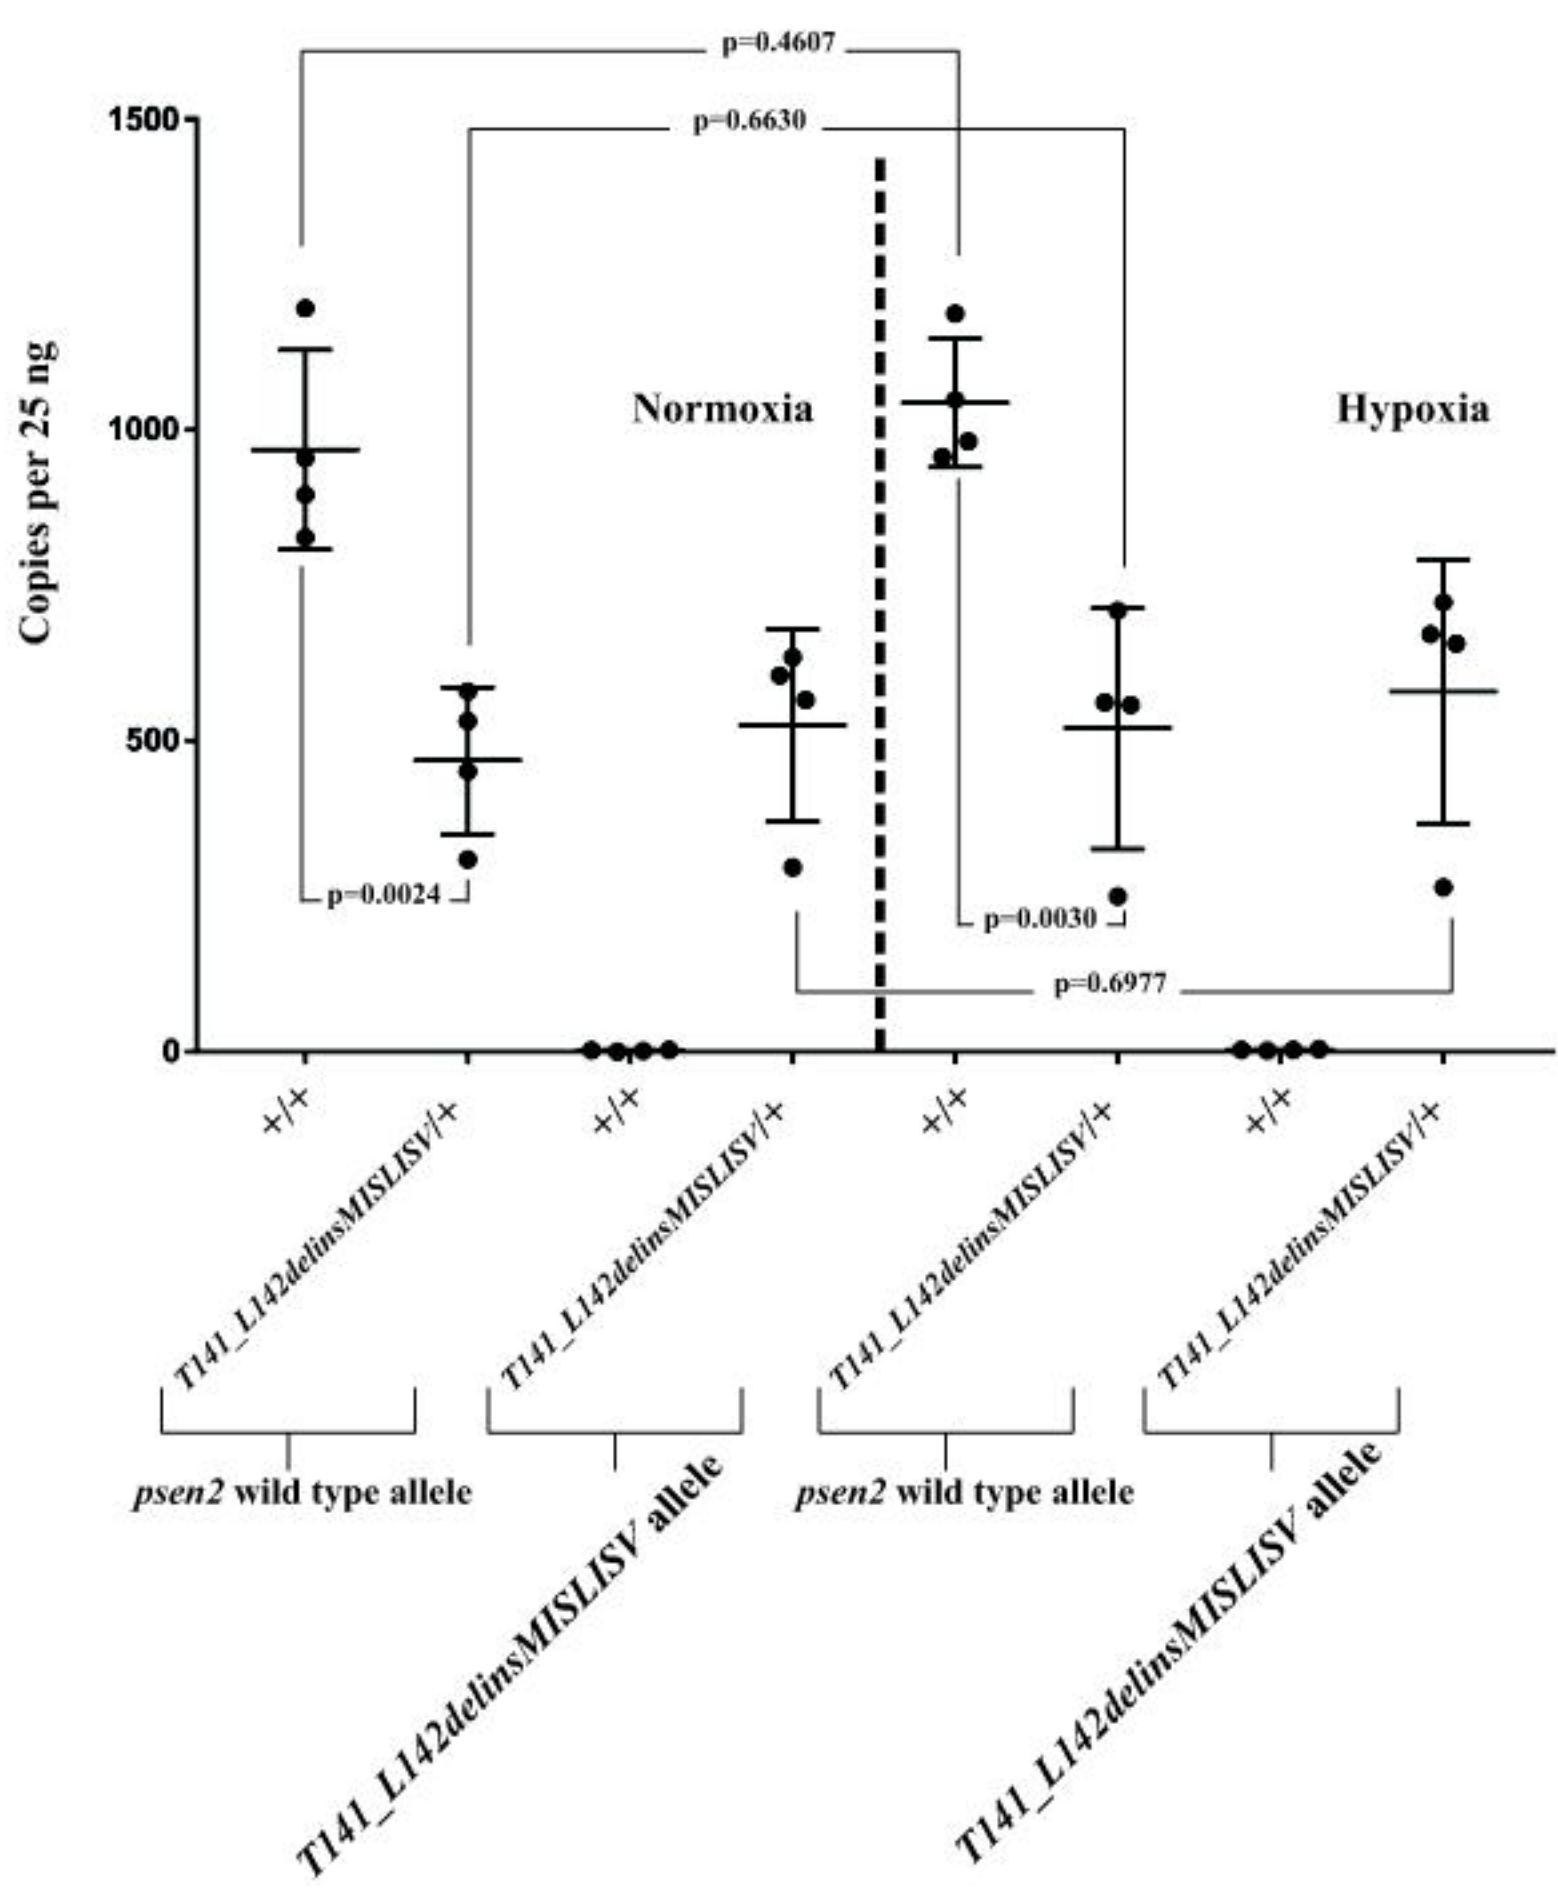

*psen2* wild type allele and *N140fs* allele-specific expression in 25 ng total brain cDNA

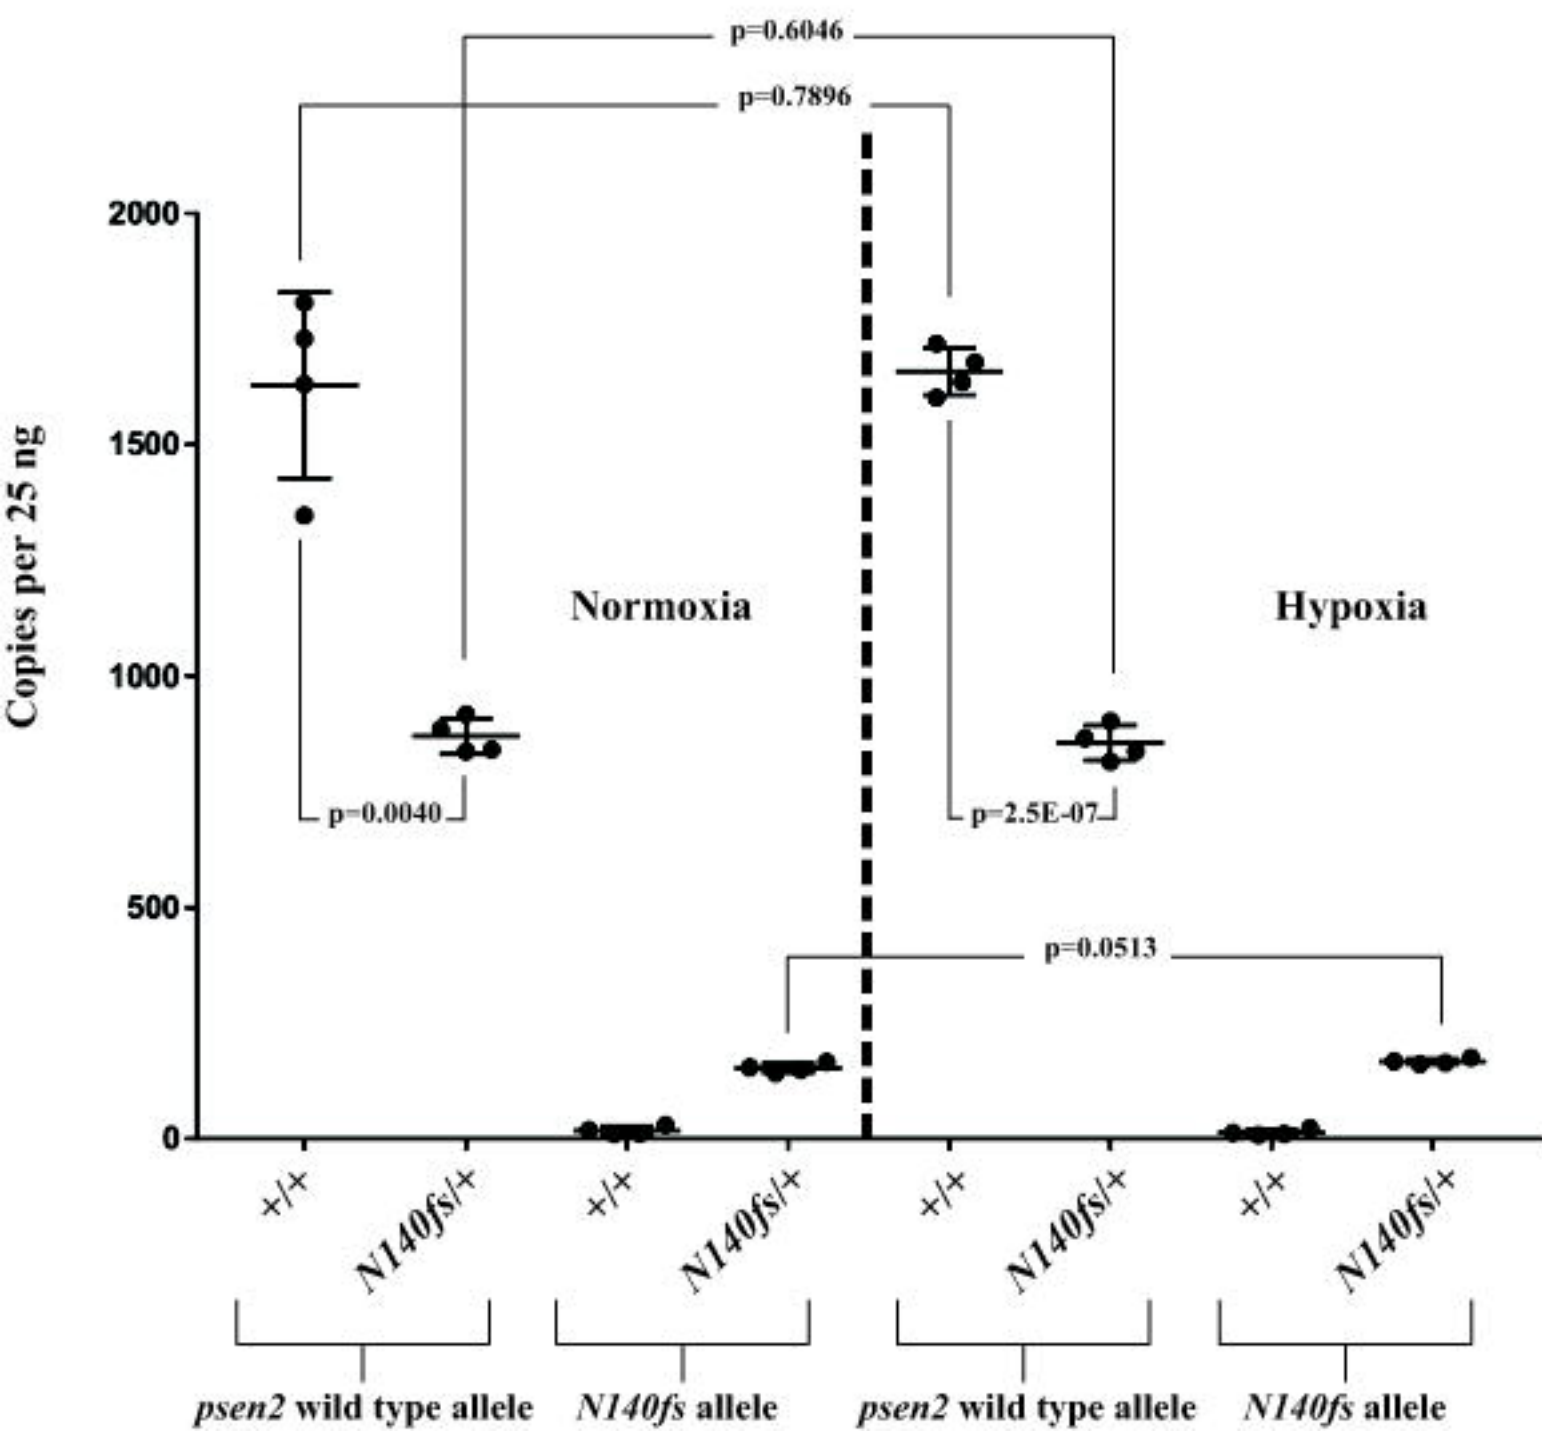

**A G0 fish**

**“N140I oligo”  
-injected**

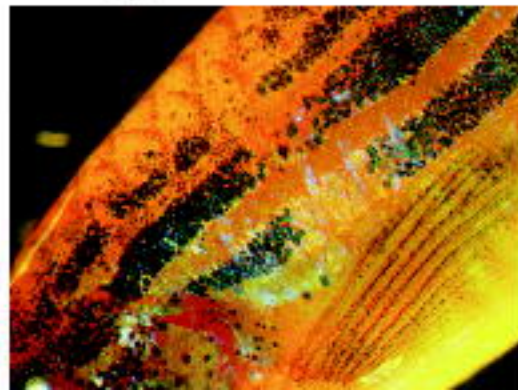

**“V147I oligo”  
-injected**

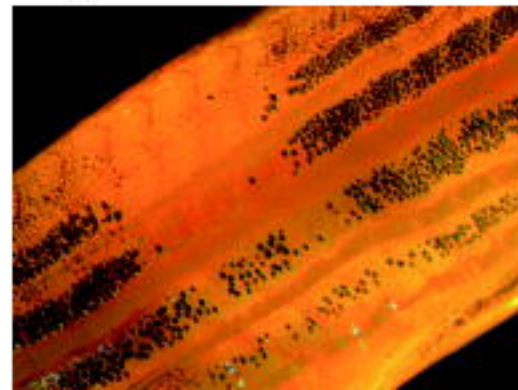

**Uninjected**

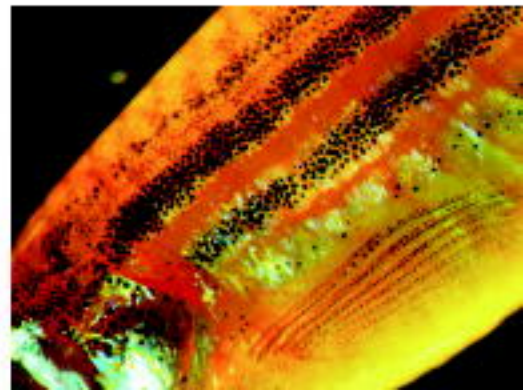

# B T141\_L142delinsMISLISV

bioRxiv preprint doi: <https://doi.org/10.1101/414144>; this version posted September 11, 2018. The copyright holder for this preprint (which was not certified by peer review) is the author/funder. All rights reserved. No reuse allowed without permission.

## Homozygous

## Heterozygous

## Wildtype

### 1 month old

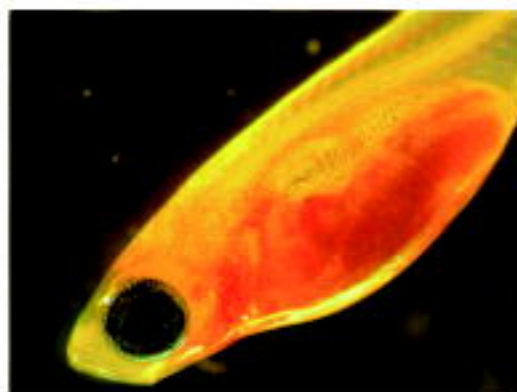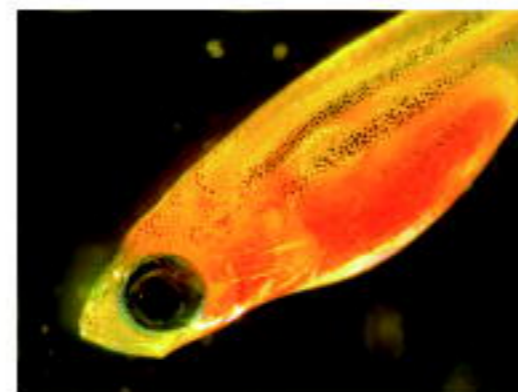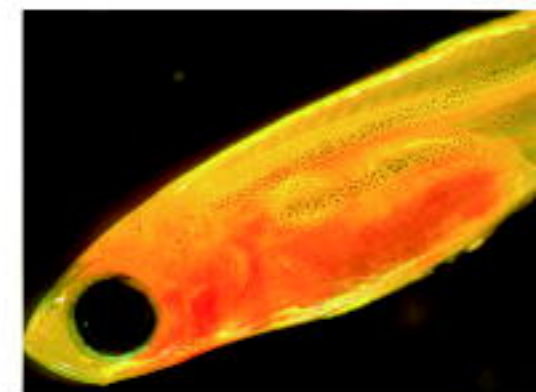

### 2 months old

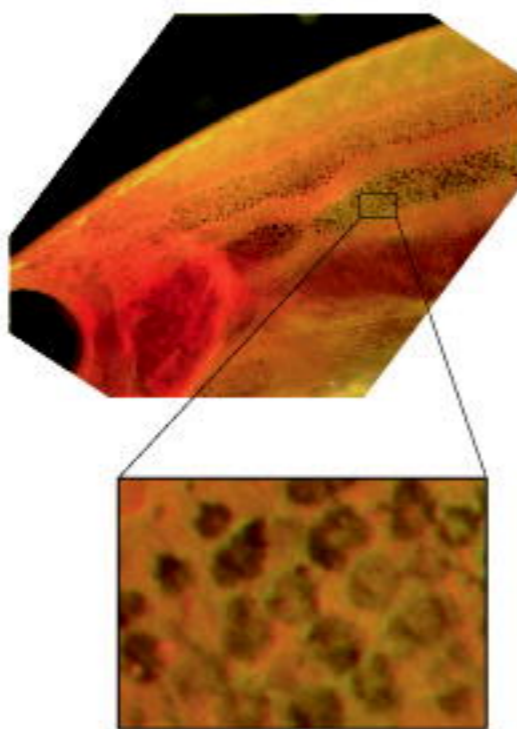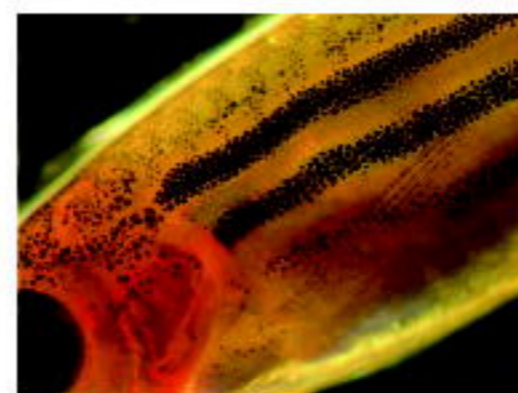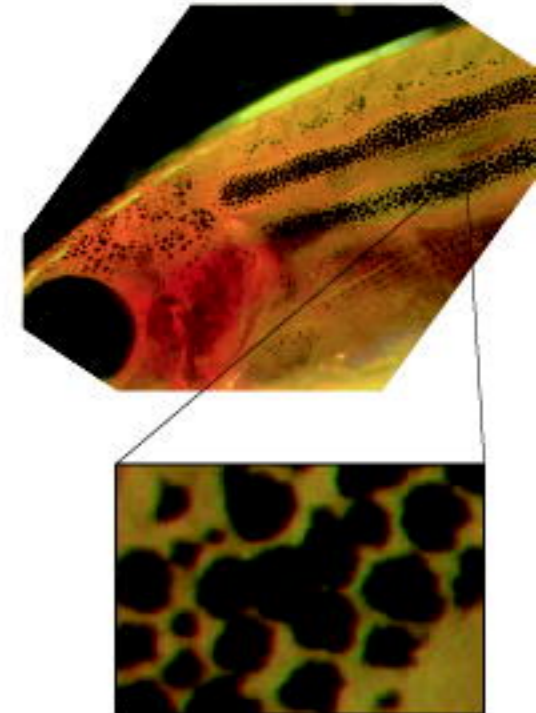

### 6 months old

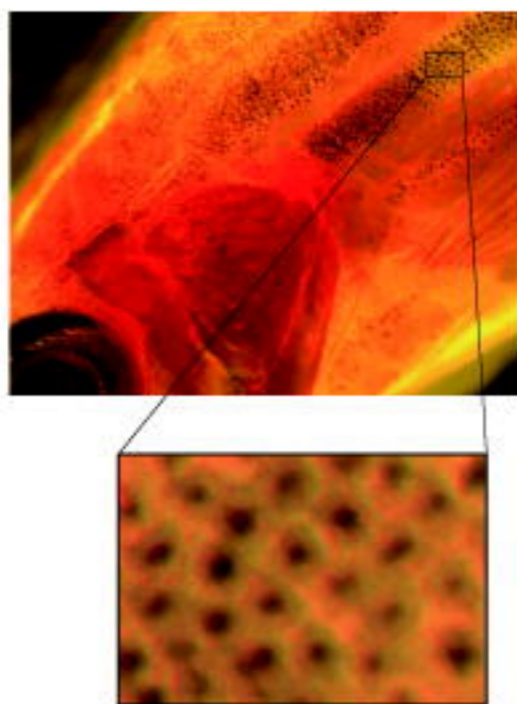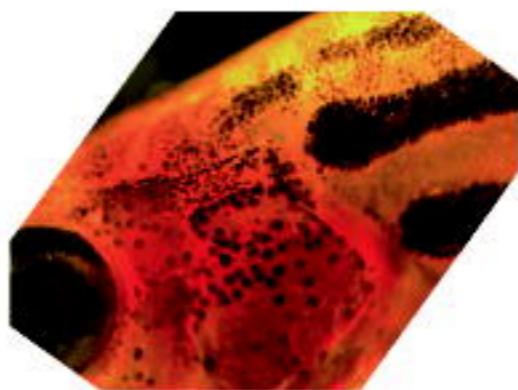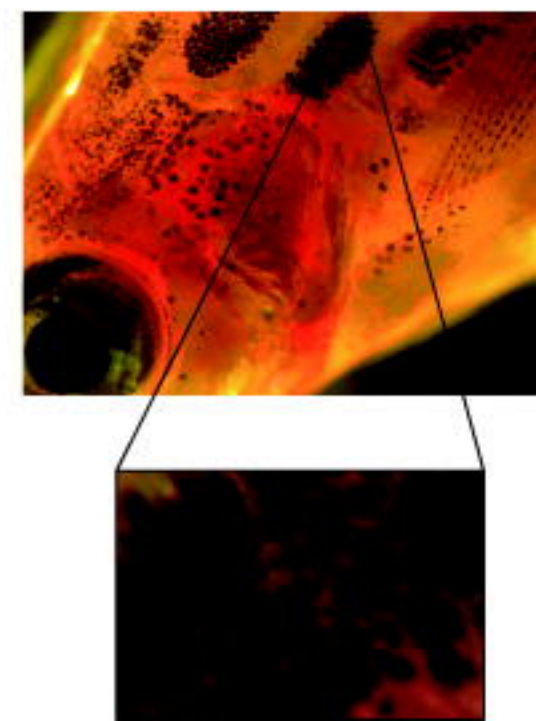

**Homozygous****Heterozygous****Wildtype****1 month old**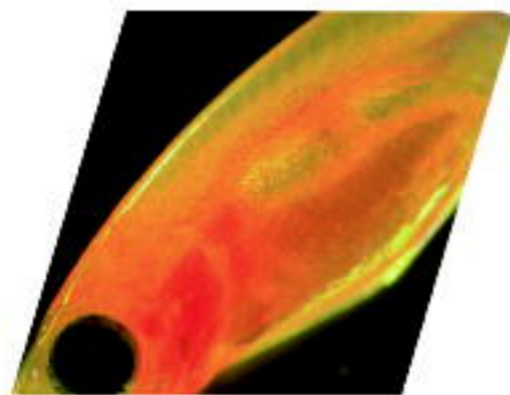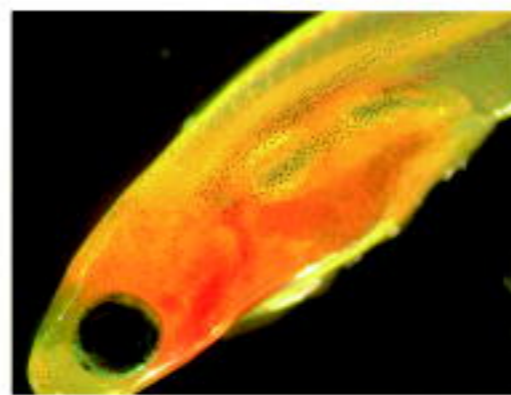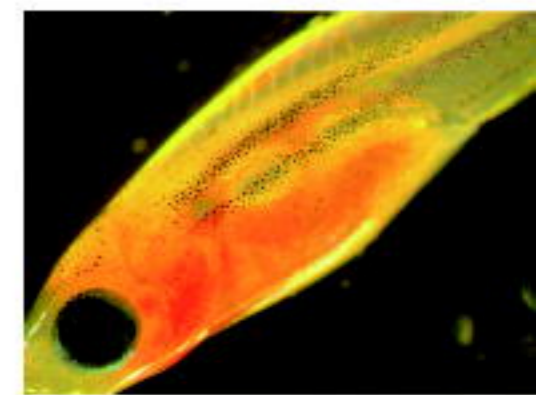**2 months old**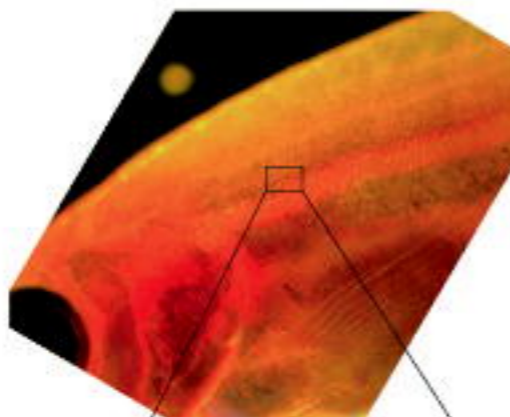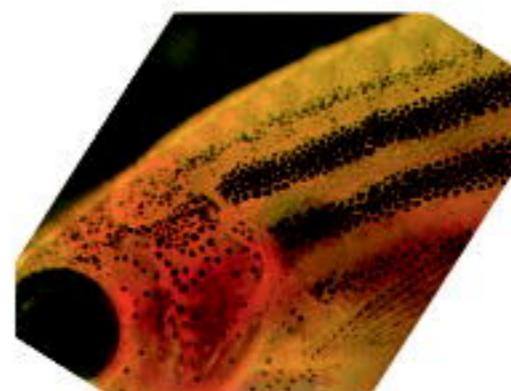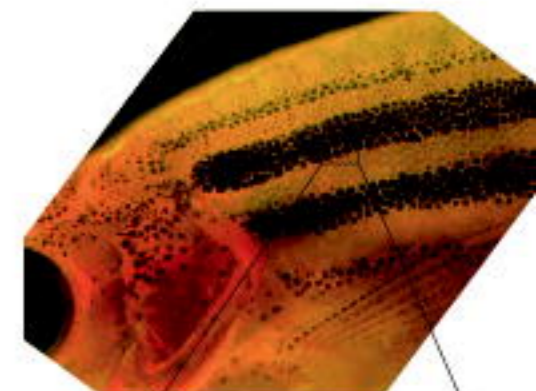**6 months old**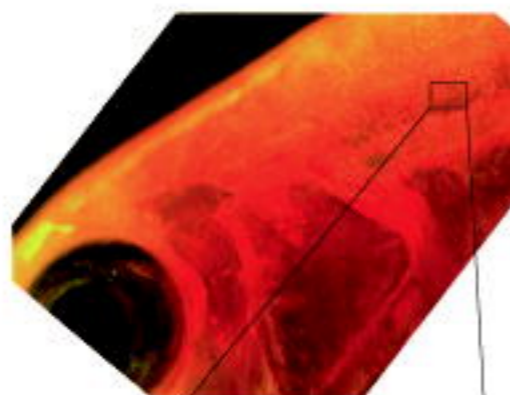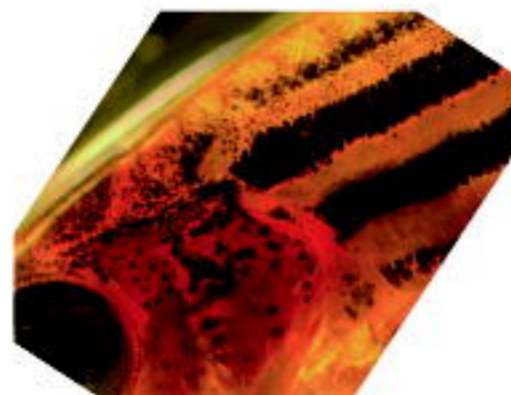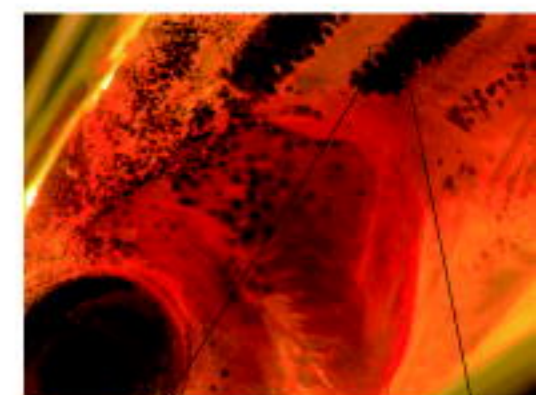

**D**

48 hpf

+/+

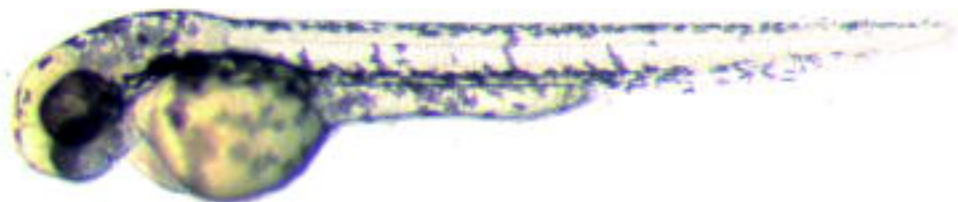*NI40fs/NI40fs*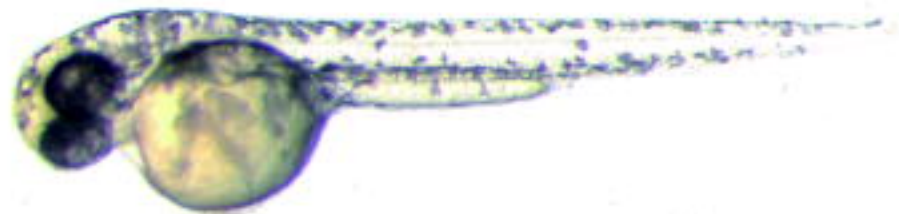

**A**

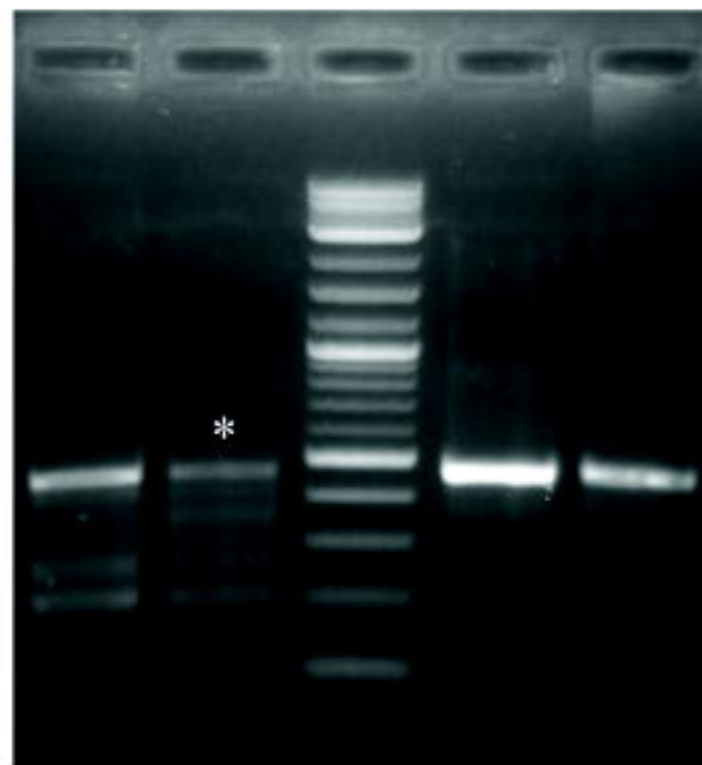

Lane

With T7 endonuclease I

1. - Uninjected TU embryos
2. - Target-sgRNA + Cas9 protein injected TU embryos

3. - 2 Log DNA size marker

Without T7 endonuclease I

4. - Uninjected TU embryos
5. - Target-sgRNA + Cas9 protein injected TU embryos

**B**

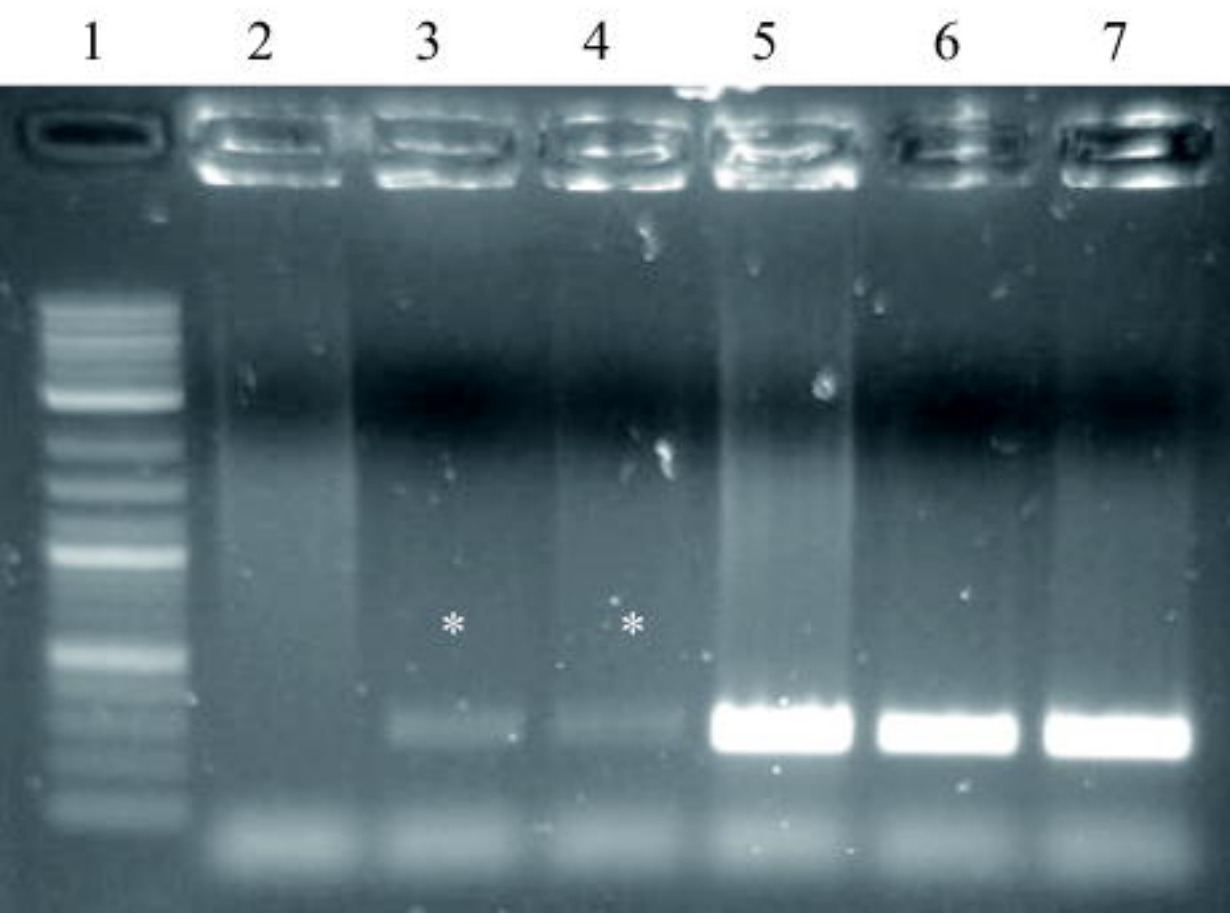

Lane

1. - 2 Log DNA size marker

“N140I” allele-specific detection PCR

2. - Uninjected TU embryos
3. - “N140I oligo” + CRISPR/Cas9 system injected TU embryos 1st batch
4. - “N140I oligo” + CRISPR/Cas9 system injected TU embryos 2nd batch

Wild type allele-specific detection PCR

5. - Uninjected TU embryos
6. - “N140I oligo” + CRISPR/Cas9 system injected TU embryos 1st batch
7. - “N140I oligo” + CRISPR/Cas9 system injected TU embryos 2nd batch



C

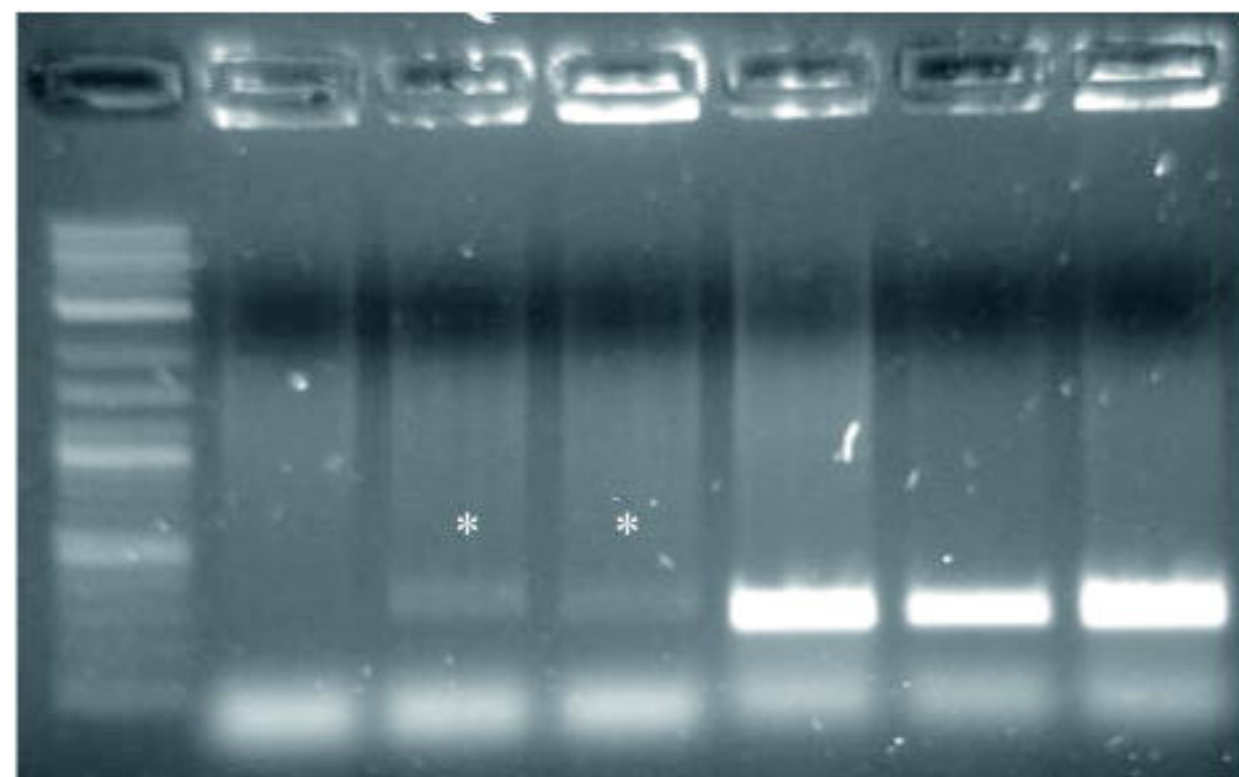

Lane

1. - 2 Log DNA size marker

“V147I” allele-specific detection PCR

2. - Uninjected TU embryos

3. - “V147I oligo” + CRISPR/Cas9 system injected TU embryos 1st batch

4. - “V147I oligo” + CRISPR/Cas9 system injected TU embryos 2nd batch

Wild type allele-specific detection PCR

5. - Uninjected TU embryos

6. - “V147I oligo” + CRISPR/Cas9 system injected TU embryos 1st batch

7. - “V147I oligo” + CRISPR/Cas9 system injected TU embryos 2nd batch

D

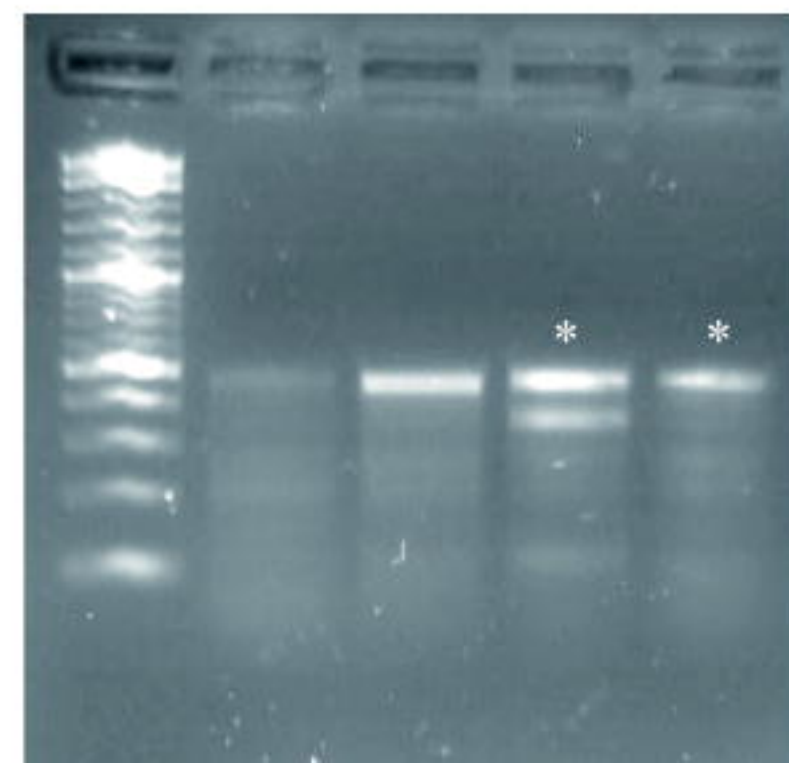

Lane

With T7 endonuclease I

1. - 2 Log DNA size marker

2. - Uninjected TU embryos

3. - F1 fish without any random mutation (wildtype)

4. - F1 fish with a random mutation (heterozygous mutant)

5. - F1 fish with a random mutation (heterozygous mutant)

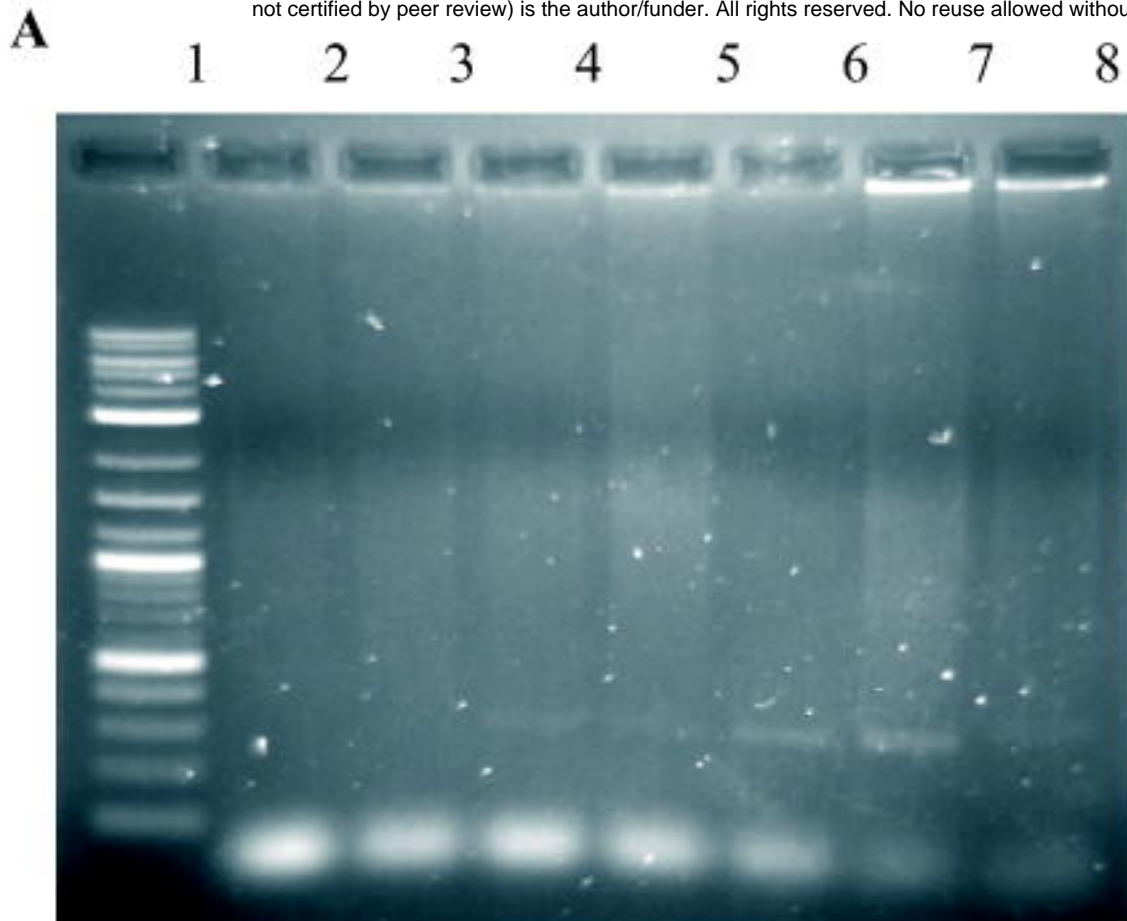

Lane

1. - 2 Log DNA size marker

“N140I” allele-specific detection PCR

2. - Uninjected TU embryos

3. - “N140I”-positive Fish F0\_1

4. - “N140I”-positive Fish F0\_2

5. - “N140I”-positive Fish F0\_3

6. - “N140I”-positive Fish F0\_4

7. - “N140I”-positive Fish F0\_5

8. - “N140I”-positive Fish F0\_6

**B**

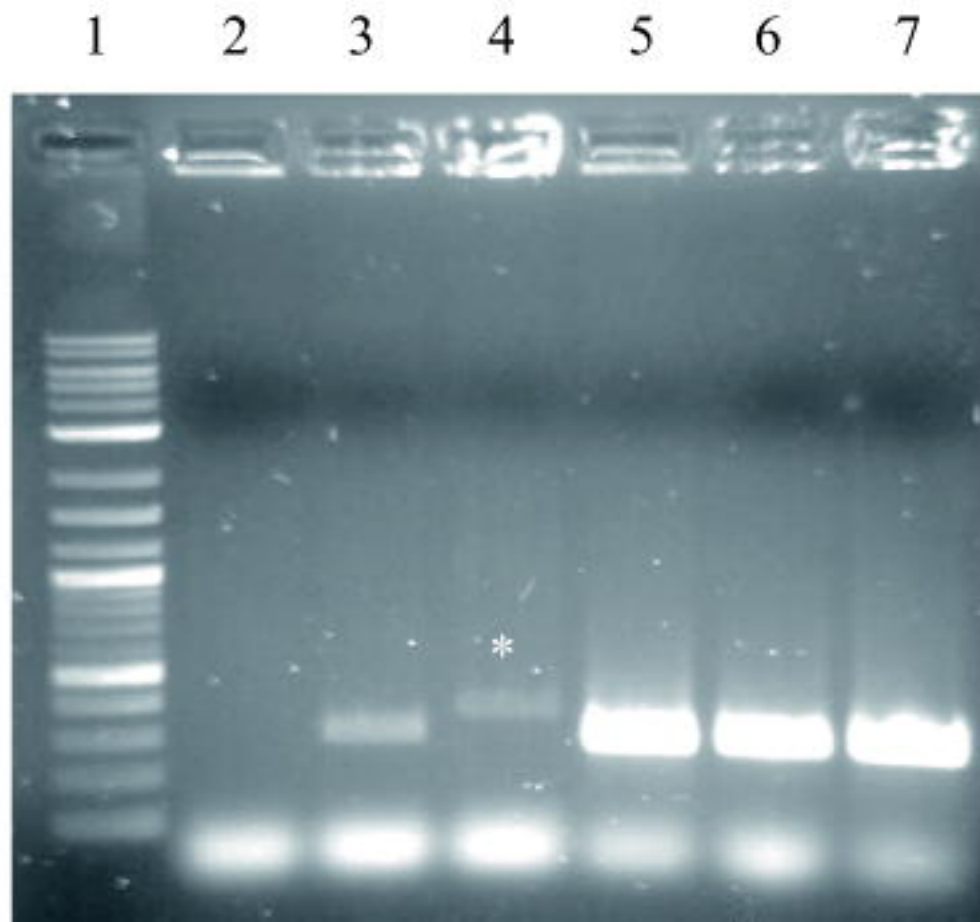

Lane

1. - 2 Log DNA size marker

“N140I” allele-specific detection PCR

2. - Uninjected TU embryos

3. - “N140I oligo” + CRISPR/Cas9 system injected TU embryos 2nd batch

4. - embryos from “N140I”-positive Fish F0\_12 crossing TU wildtype fish

Wild type allele-specific detection PCR

5. - Uninjected TU embryos

6. - “N140I oligo” + CRISPR/Cas9 system injected TU embryos 2nd batch

7. - embryos from “N140I”-positive Fish F0\_12 crossing TU wildtype fish

C

1 2 3 4 5 6 7 8 Lane

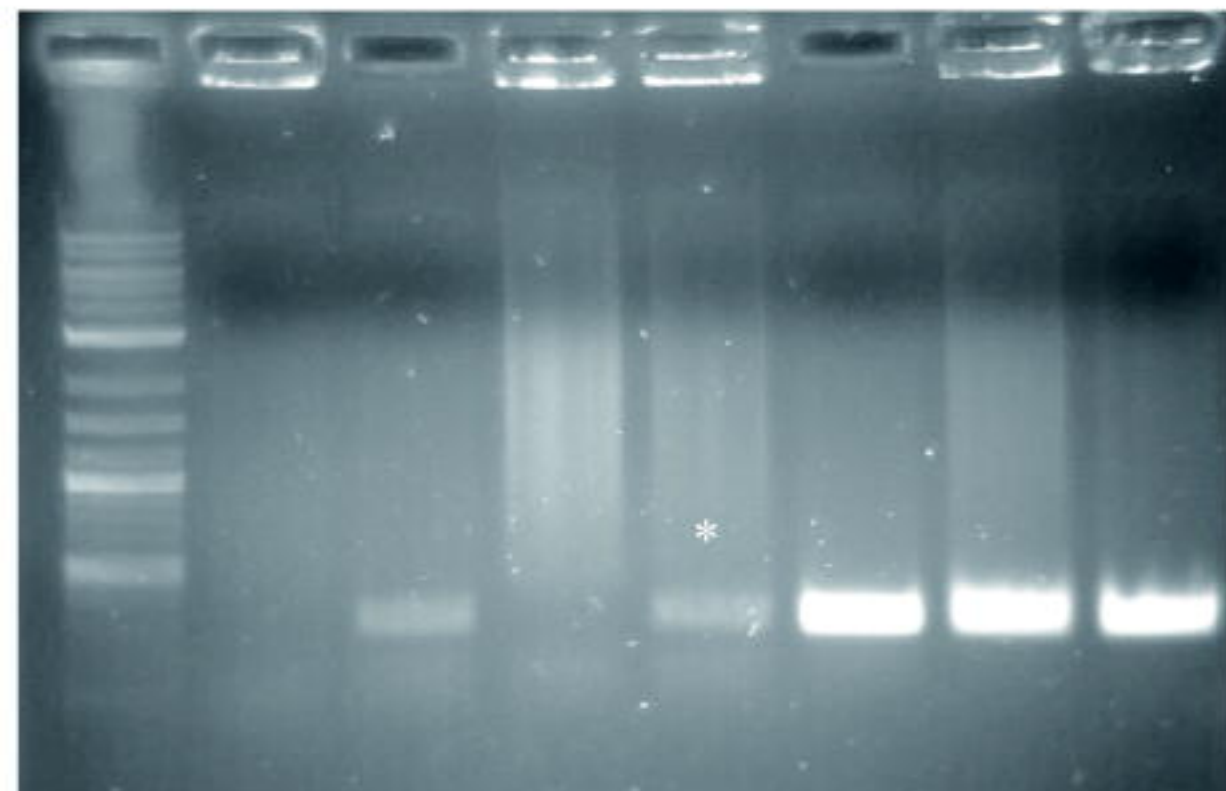

1. - 2 Log DNA size marker

“V147I” allele-specific detection PCR

2. - Uninjected TU embryos

3. - “V147I oligo” + CRISPR/Cas9 system injected TU embryos 1nd batch

4. - embryos from “V147I”-positive Fish F0\_1 crossing TU wildtype fish

5. - embryos from “V147I”-positive Fish F0\_3 crossing TU wildtype fish

Wild type allele-specific detection PCR

6. - “V147I oligo” + CRISPR/Cas9 system injected TU embryos 1nd batch

7. - embryos from “V147I”-positive Fish F0\_1 crossing TU wildtype fish

8. - embryos from “V147I”-positive Fish F0\_3 crossing TU wildtype fish

D

1 2 3 4 5

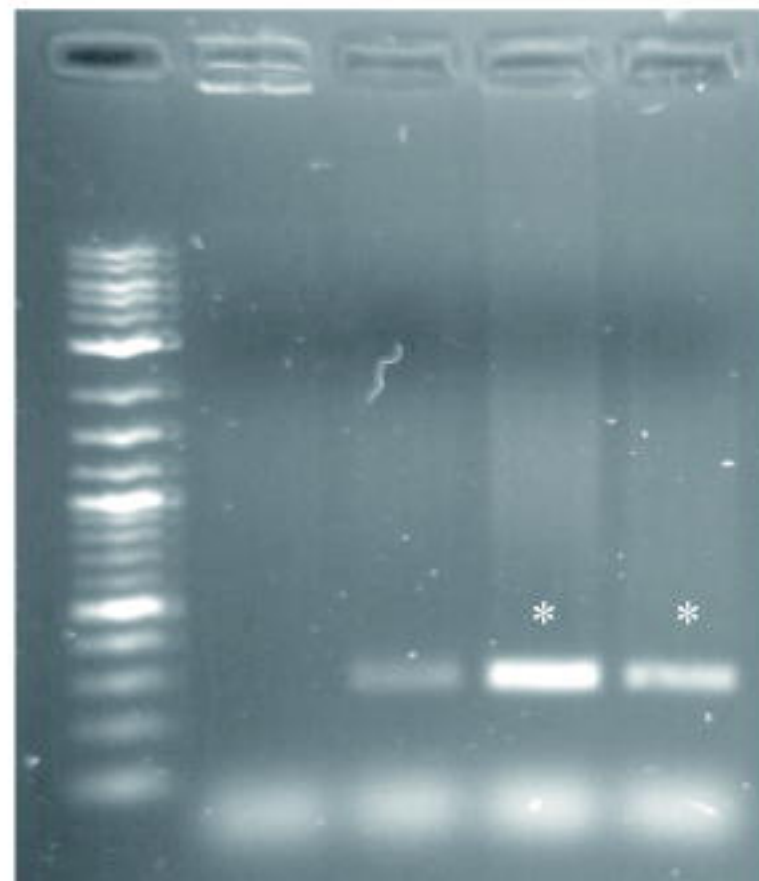

Lane

1. - 2 Log DNA size marker

“V147I” allele-specific detection PCR

2. - Uninjected TU embryos

3. - embryos from “V147I”-positive Fish F0\_3 crossing TU wildtype fish

4. - Fish F1\_2 form “V147I”-positive Fish F0\_3 crossing TU wildtype fish

5. - Fish F1\_8 form “V147I”-positive Fish F0\_3 crossing TU wildtype fish

**E**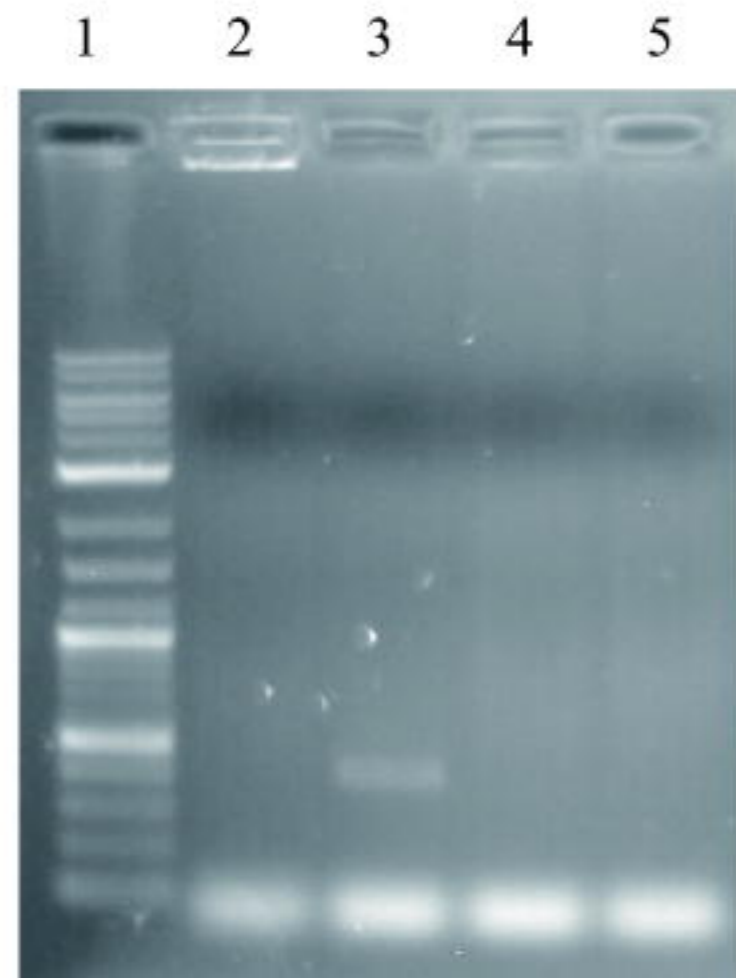

Lane

1. - 2 Log DNA size marker

“V147I” allele-specific detection PCR (with the reverse primer of T7 endonuclease I assay)

2. - Uninjected TU embryos

3. - embryos from “V147I”-positive Fish F0\_3 crossing TU wildtype fish

4. - Fish F1\_2 form “V147I”-positive Fish F0\_3 crossing TU wildtype fish

5. - Fish F1\_8 form “V147I”-positive Fish F0\_3 crossing TU wildtype fish

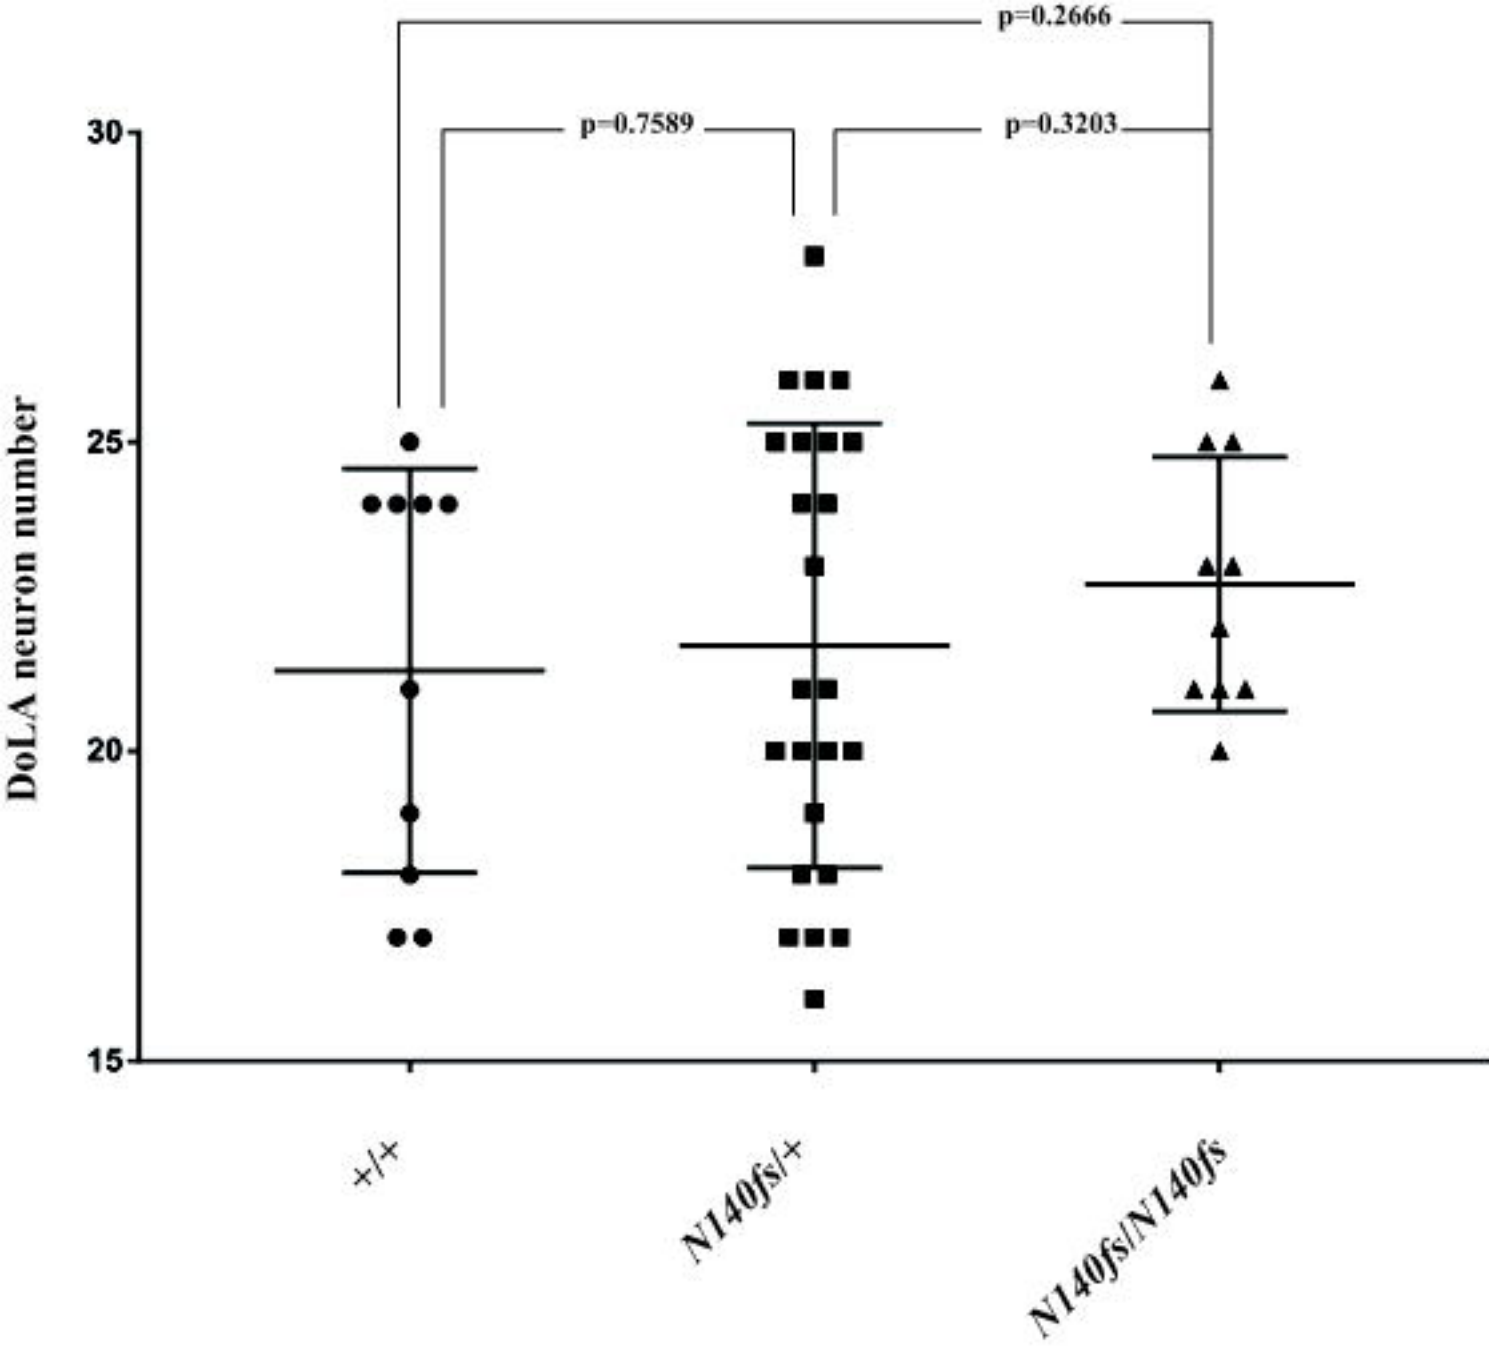

**A**

bioRxiv preprint doi: <https://doi.org/10.1101/414144>; this version posted September 11, 2018. The copyright holder for this preprint (which was not certified by peer review) is the author/funder. All rights reserved. No reuse allowed without permission.

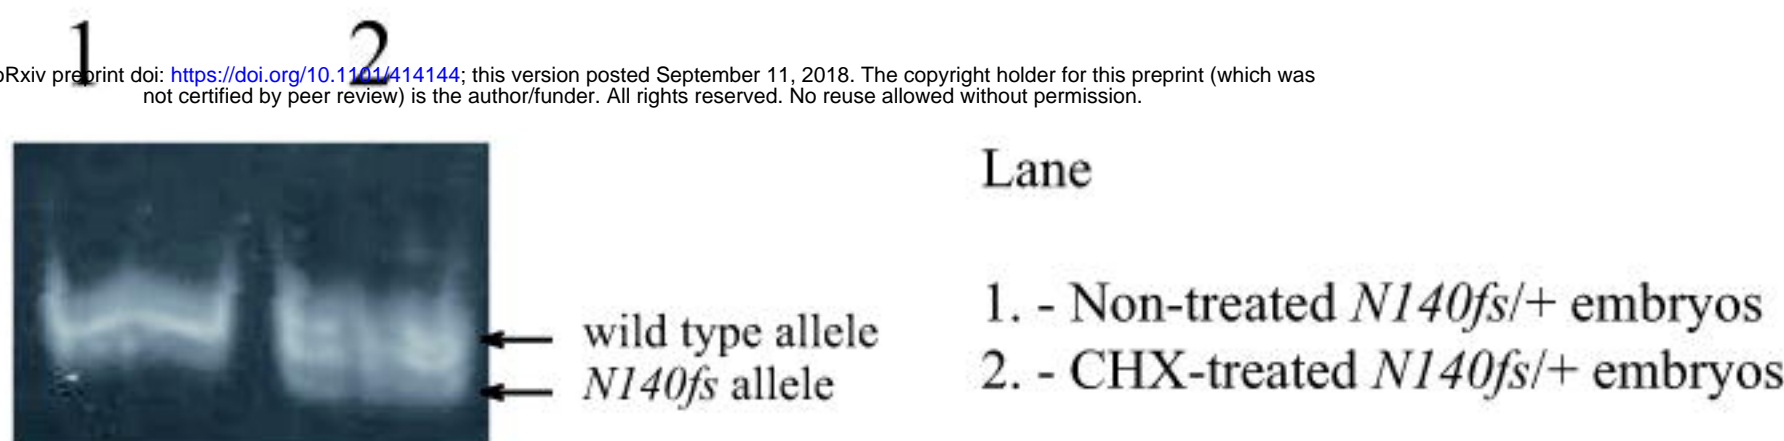**B**

*psen2* wildtype allele and *N140fs* allele specific expression in 25 ng total cDNA

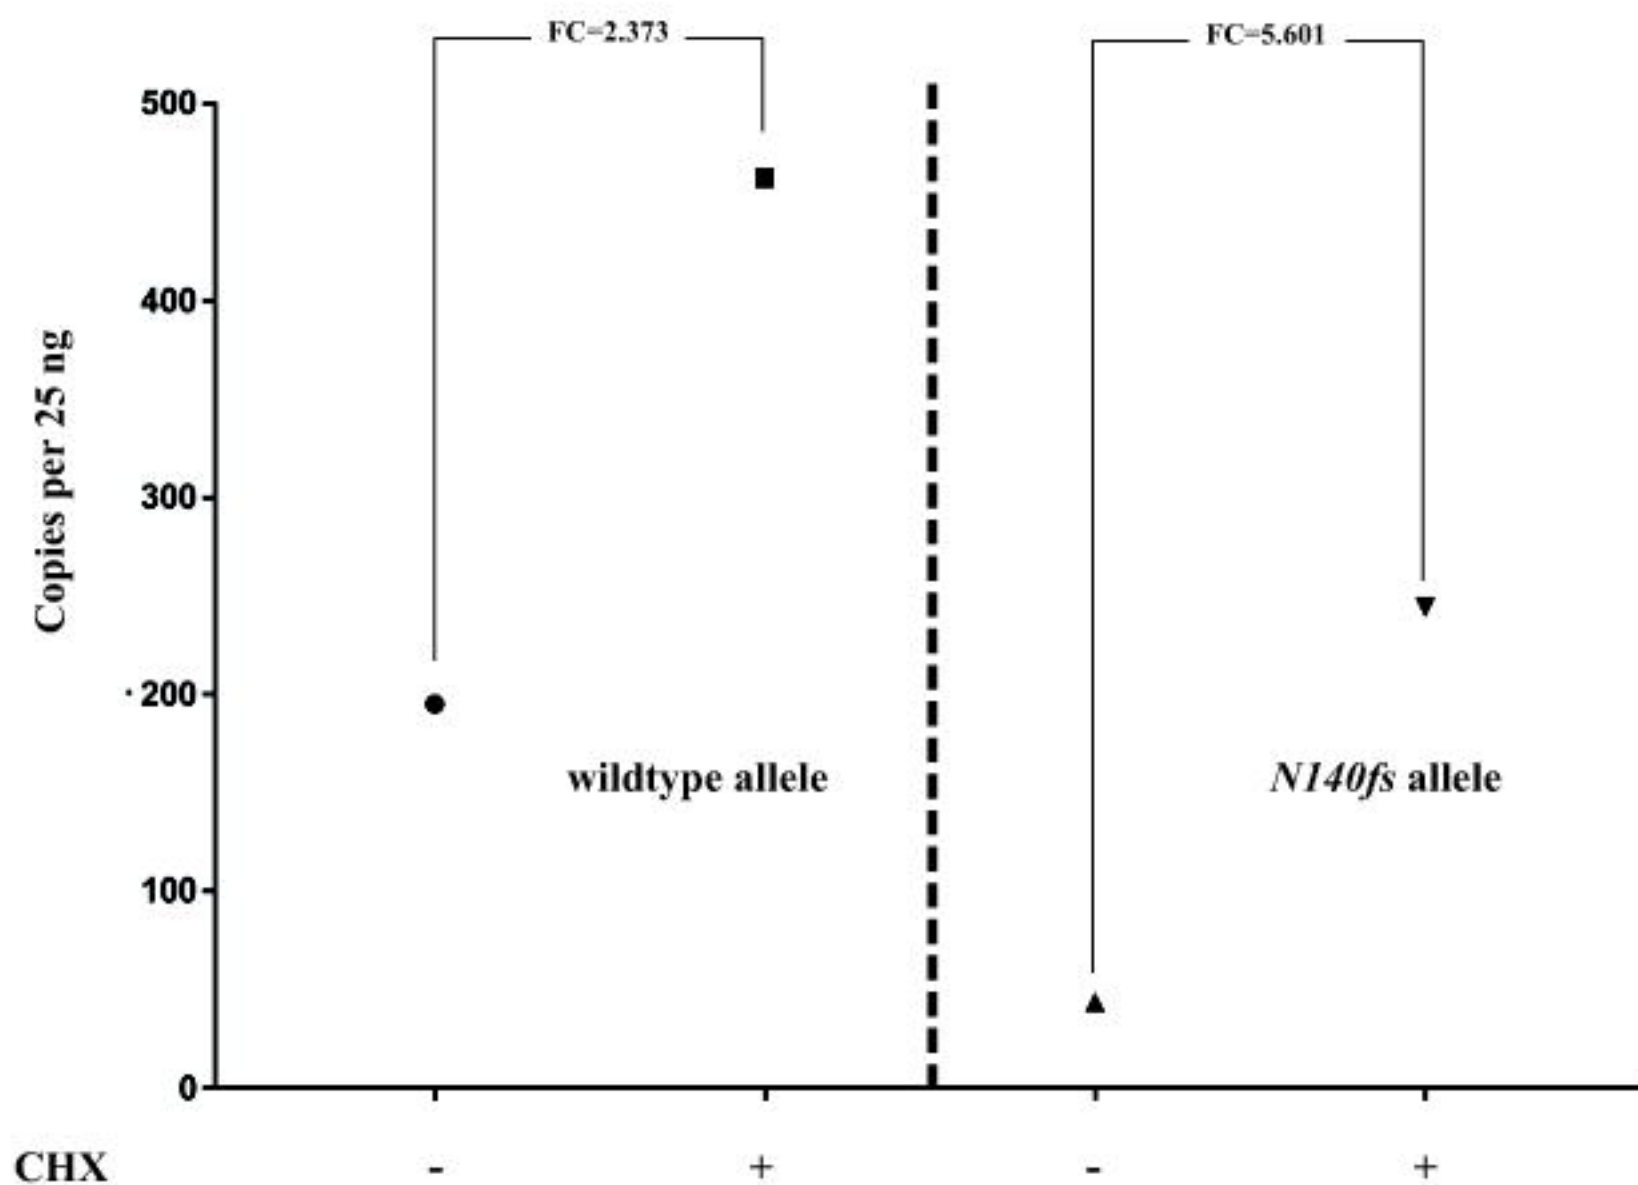

Source: https://www.biorxiv.org/content/10.1101/414144v1.full.pdf
